# Supplementary material for: Regional and temporal variations in organ donation across the UK (secondary analyses of databases)
Source: PubMed Central journal article supplement — BMJ Open. 2011 Oct 3;1(2):e000055. doi: 10.1136/bmjopen-2011-000055 (PMC3211055; doi:10.1136/bmjopen-2011-000055), 2011-10-03
Supplement: bmjopen-2011-000055-s1.pdf [file bmjopen-2011-000055-s1.pdf]

## ■ Research review guidelines : modified from RATS guidelines

| ASK THIS OF THE MANUSCRIPT                                                                                                                                                                                                             | THIS SHOULD BE INCLUDED IN THE MANUSCRIPT                                                                                                                                                         | ✓<br><>           |
|----------------------------------------------------------------------------------------------------------------------------------------------------------------------------------------------------------------------------------------|---------------------------------------------------------------------------------------------------------------------------------------------------------------------------------------------------|-------------------|
| <p><b>R Relevance of study question</b></p> <p>Is the research question interesting?</p> <p>Is the research question relevant to clinical practice, public health, or policy? <i>It is relevant to policy</i></p>                      | <p>Research question explicitly stated</p> <p>Research question justified and linked to the existing knowledge base (empirical research, theory, policy)</p>                                      | <p>✓</p> <p>✓</p> |
| <p><b>A Appropriateness of the method</b></p> <p>Is the methodology used the best approach for the study aims?</p>                                                                                                                     | <p>Study design described and justified : <i>data for all organ donations and registrations was required in order to compare trends across the four UK regions.</i></p>                           | <p>✓</p>          |
| <p><b>T Transparency of procedures</b></p>                                                                                                                                                                                             |                                                                                                                                                                                                   |                   |
| <p><i>Data collection</i></p> <p>Was collection of data systematic and comprehensive?</p> <p>Why and when was data collection stopped, and is this reasonable?</p>                                                                     | <p>Method (s) outlined : <i>all available data from centralized sources collected</i></p> <p>End of data collection justified and described: <i>all available complete data was collected</i></p> | <p>✓</p> <p>✓</p> |
| <p><b>S Soundness of interpretive approach</b></p> <p><i>Analysis</i></p> <p>Is the type of analysis appropriate for the type of study?</p> <p>Are the interpretations clearly presented and adequately supported by the evidence?</p> | <p>Analytic approach described in depth and justified</p> <p>Statistical analysis conducted using appropriate test</p> <p>Analysis, presentation and interpretation provided</p>                  | <p>✓</p> <p>✓</p> |

|                                                                                                                                                                                  |                                                                                                                                                                                                  |                   |
|----------------------------------------------------------------------------------------------------------------------------------------------------------------------------------|--------------------------------------------------------------------------------------------------------------------------------------------------------------------------------------------------|-------------------|
| <p><i>Discussion and presentation</i></p> <p>Is adequate account taken of previous knowledge and how the findings add?</p> <p>Is the manuscript well written and accessible?</p> | <p>Findings presented with reference to existing literature, and how they contribute</p> <p>Evidence of following guidelines (format, word count)<br/>Written for a health sciences audience</p> | <p>✓</p> <p>✓</p> |
|----------------------------------------------------------------------------------------------------------------------------------------------------------------------------------|--------------------------------------------------------------------------------------------------------------------------------------------------------------------------------------------------|-------------------|
