# Supplementary material for: Regional and temporal variations in organ donation across the UK (secondary analyses of databases)
Source: PubMed Central journal article supplement — BMJ Open. 2011 Oct 3;1(2):e000055. doi: 10.1136/bmjopen-2011-000055 (PMC3211055; doi:10.1136/bmjopen-2011-000055), 2011-10-03
Supplement: bmjopen-2011-000055.draft_revisions.pdf [file bmjopen-2011-000055.draft_revisions.pdf]

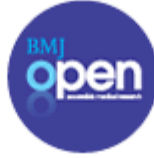

**Consent to organ donation should not be presumed before exploring regional variations**

|                               |                                                                                                                                                                                                                                      |
|-------------------------------|--------------------------------------------------------------------------------------------------------------------------------------------------------------------------------------------------------------------------------------|
| Journal:                      | <i>BMJ Open</i>                                                                                                                                                                                                                      |
| Manuscript ID:                | BMJ Open.2010.000055                                                                                                                                                                                                                 |
| Article Type:                 | Research                                                                                                                                                                                                                             |
| Date Submitted by the Author: | 30-Dec-2010                                                                                                                                                                                                                          |
| Complete List of Authors:     | McGlade, Donal; University of Ulster, Biomedical Sciences<br>Rae, Gordon; University of Ulster, Psychology<br>McClenahan, Carol; University of Ulster, Psychology<br>Pierscionek, Barbara; University of Ulster, Biomedical Sciences |
| <b>Subject Heading</b>:       | Health policy                                                                                                                                                                                                                        |
| Keywords:                     | Health policy < HEALTH SERVICES ADMINISTRATION & MANAGEMENT, Transplant medicine < INTERNAL MEDICINE, LAW (see Medical Law), organ donation, presumed consent, UK regional variations                                                |
|                               |                                                                                                                                                                                                                                      |

SCHOLARONE™  
Manuscripts

only

1  
2  
3  
4 **Consent to organ donation should not be presumed before exploring regional variations**  
5

6 Donal McGlade[1], Gordon Rae[2], Carol McClenahan[2], Barbara Pierscionek[1,\*]  
7  
8

- 9  
10 1. School of Biomedical Science, University of Ulster, Cromore Road  
11 Coleraine, BT52 1SA  
12 2. School of Psychology, University of Ulster, Cromore Road, Coleraine,  
13 BT52 1SA  
14  
15

16  
17  
18  
19  
20 \*Corresponding author email b.pierscionek@ulster.ac.uk telephone: 02870123293  
21  
22  
23  
24  
25  
26  
27  
28  
29

30 Key words: *organ donation, presumed consent, UK regional variations, EU organ donation*  
31  
32

33 Word count: 2086 words  
34  
35  
36  
37  
38  
39  
40  
41  
42  
43  
44  
45  
46  
47  
48  
49  
50  
51  
52  
53  
54  
55  
56  
57  
58  
59  
60

1  
2  
3  
4  
5  
6  
7  
8  
9  
10  
11  
12  
13  
14  
15  
16  
17  
18  
19  
20  
21  
22  
23  
24  
25  
26  
27  
28  
29  
30  
31  
32  
33  
34  
35  
36  
37  
38  
39  
40  
41  
42  
43  
44  
45  
46  
47  
48  
49  
50  
51  
52  
53  
54  
55  
56  
57  
58  
59  
60

**Objectives:** To explore regional variations in donation of cadaveric solid organs and tissues across the four devolved health administrations of the UK (England, Scotland, Wales & Northern Ireland).

**Design:** A secondary analysis of databases from NHS Blood & Transplant (1990-2009) and from the National Organ Procurement Service for the Republic of Ireland, Eurotransplant International Foundation and Scandiatransplant.

**Results:** Statistically significant differences were found for the cornea between England and Scotland as well as England and Northern Ireland for every year of the nineteen years investigated and between Wales and Northern Ireland for all but two years. The fewest significant differences occurred between Scotland and Northern Ireland. For around half of the years or more, statistically significant differences were evident in kidney and liver donations between Scotland and Wales and England and Wales. For both regional pairs (Scotland/England, England/Wales), the pattern of kidney and liver donations were matched over most years. Comparison of Northern Ireland with Scotland and England showed 8/19 years for which kidney donations were significantly higher than for both Scotland and England. Fewer differences were found for liver donations: Scotland and Northern Ireland (6/19); England and Northern Ireland (5/19). Between Scotland and England there were very few significant differences in kidney and liver donations and there were no significant differences for any year between Wales and Northern Ireland for kidney and liver donations. In the case of lung and heart donations, there were very few significant differences between any of the regions.

**Conclusion:** Data across the UK show patterns of similarities and differences in donation rate that vary with type of organ donated. Further exploration of underlying regional differences, organisational issues and practices and attitudes that may affect organ donation, particularly with respect to certain organs, should be undertaken before legislative measures are considered.

**Article focus:**

- To investigate organ donation of cadaveric solid organs and tissues across the four devolved health administrations of the UK;
- To consider reasons for regional variations and those related to organ type, drawing on regional differences in culture and practice and on findings in other EU countries.

**Key messages:**

- organ donation and registration rates vary across the four regions of UK;
- variations depend on the type of organ donated;
- recognition of regional variations in donation and registration rates and the underlying reasons are required before attempts to introduce presumed consent legislation nationally.

**Strengths & limitations:** The strengths of this article are its novelty, as this is the first article that has analysed data across the UK and shown differences in donation rates in the four regions; its timeliness given the shortfall in organ donations and the continuing debate about altering legislation to permit presumed consent and its importance in highlighting that regional differences need to be considered before any national changes to legislation are made. The limitation of this work was that data from other EU countries, for the entire time period investigated, were not available.

## Introduction

1  
2  
3  
4  
5 Approximately 80-90% of the UK population support the principle of organ donation[1], yet,  
6  
7 only 28% of the population carry an organ donor card (Pocock P. 2010). Despite advances in  
8  
9 transplantation medicine, organ shortage is the single most limiting factor preventing  
10  
11 potential recipients from receiving the benefits of transplantation.[2] If the overwhelming  
12  
13 support for organ donation could be directly translated into a willingness to donate, this  
14  
15 should bode well for a presumed consent system, (allowing organs to be used for  
16  
17 transplantation unless the individual has explicitly objected). However, interpretation of these  
18  
19 findings is far from simple. The authors argue that before considering a presumed consent  
20  
21 system, differences in donation and registration rates for different organs in the four regions  
22  
23 of the UK need to be investigated and reasons for any differences explored. Without such  
24  
25 research, a nationally imposed system for all organs may fail or create regional inequalities.  
26  
27 This paper presents an analysis of data of organ donation and registration in the four regions  
28  
29 of the UK for five organ types: kidney, liver, heart, lung and cornea in order to determine  
30  
31 whether significant differences exist across the four regions and whether these vary  
32  
33 depending on the organ. Comparisons are made to European nations that have adopted  
34  
35 presumed consent as well as to those that have not.  
36  
37  
38  
39  
40  
41  
42

## Methods

43  
44  
45 Information about all organ donations and registration in the four regions of the UK:  
46  
47 England, Scotland, Wales and Northern Ireland was obtained from NHS Blood & Transplant  
48  
49 for all available years: from 1990-2009.[3] Data from other European nations was provided  
50  
51 from the National Organ Procurement Service for the Republic of Ireland, Eurotransplant  
52  
53 International Foundation and Scandiatransplant. Statistical analysis of the data was conducted  
54  
55 using the z-test for independent proportions which is appropriate for dealing with data from  
56  
57 whole populations.[4]  
58  
59  
60

## Results and Discussion

### *Regional variations in registration and donation*

The UK currently operates a system of informed consent requiring individuals who wish to donate, to formally register their intention on a centralised register and to carry an organ donor card. Figure 1a shows that since the organ donor register was first launched in 1994, Wales has consistently outperformed other parts of the UK in terms of the percentage of population registered, with Scotland in second position, England third and Northern Ireland last. (A caveat is that although records are updated periodically to remove those who have died subsequent to being registered, organ donor registration rates may still include some entries of deceased individuals. This should not, however, affect regional variations.)

When the registration rates are compared to donation rates, the trends are somewhat different.[3] The rate of organ donation is consistently higher in Wales than the UK average for the majority of the last 20 years (Figure 1b). Donation rates in Northern Ireland are the second highest, achieving a higher than UK average in 13 of those years, with Scotland achieving this in 6 years and England capable of achieving this in only 3 years. So whilst registration and donation are both highest in Wales, amongst the other parts of the UK registration and donation do not follow similar trends. In Northern Ireland, for example, where willingness to register as an organ donor is lower than any other UK region, the organ donation rate is generally higher than in England or Scotland. It is also notable that whilst England exhibits the least variation in organ donation over the last two decades, Scotland shows an overall decrease in donation with trends in Wales and Northern Ireland varying from year to year with the greatest fluctuations in the latter (Pocock P. 2010).

*Variations in donation according to organ type*

1  
2  
3  
4 Masked by general variations in donation are the figures for individual organs. Table 1 shows  
5  
6 the rate of donation for each region of the UK for different organs (Pocock P. 2010). The rate  
7  
8 of kidney donation has been consistently highest in Wales for most of the past 20 years.  
9  
10 Northern Ireland contributed the second highest rate of donation followed by England and  
11  
12 Scotland respectively. Similar regional variations in donation are seen for the liver. With  
13  
14 respect to heart donation, Wales was the region with the highest overall donation rate until  
15  
16 1998 when it was overtaken by Scotland and/or Northern Ireland with the exception of 2006-  
17  
18 2007. Northern Ireland had the second highest rate of donation, Scotland third and England  
19  
20 the lowest rate. The overall rate of heart donation has fallen dramatically over the twenty year  
21  
22 period for Wales, Scotland and England; Northern Ireland shows fluctuations with no  
23  
24 consistent trend.  
25  
26  
27  
28  
29  
30  
31  
32

33  
34 In contrast to falling heart donation rates, the rate of lung donation has risen since 1990, with  
35  
36 Northern Ireland being the greatest contributor over most of this period (Pocock P. 2010). The  
37  
38 overall numbers, however, are low and comparable to those of heart donation. The pattern for  
39  
40 corneal donations shows a greater consistency for most regions except Wales which  
41  
42 contributed significantly more corneal tissue than the other regions between 1995 and 2005  
43  
44 but subsequently decreased to levels comparable to pre-1995. England has the second highest  
45  
46 donation rate and Northern Ireland is the lowest for every year over the last two decades.  
47  
48  
49  
50  
51  
52  
53  
54  
55  
56  
57  
58  
59  
60

| Year  | Kidney |      |      |      | Heart |     |     |     | Lung |     |     |     | Liver |      |      |      | Cornea |      |      |      |
|-------|--------|------|------|------|-------|-----|-----|-----|------|-----|-----|-----|-------|------|------|------|--------|------|------|------|
|       | E      | S    | W    | NI   | E     | S   | W   | NI  | E    | S   | W   | NI  | E     | S    | W    | NI   | E      | S    | W    | NI   |
| 90-91 | 14.6   | 17.4 | 19.0 | 19.2 | 3.9   | 3.9 | 5.4 | 1.9 | 0.0  | 0.0 | 0.0 | 0.0 | 6.0   | 8.2  | 8.6  | 7.1  | 27.8   | 11.4 | 16.7 | 9.9  |
| 91-92 | 13.9   | 14.7 | 21.2 | 25.5 | 3.8   | 3.7 | 6.8 | 5.7 | 0.2  | 0.4 | 0.0 | 0.0 | 7.3   | 7.4  | 12.2 | 14.7 | 29.6   | 12.3 | 29.3 | 14.0 |
| 92-93 | 13.7   | 19.4 | 14.4 | 15.3 | 3.8   | 5.7 | 6.3 | 3.8 | 0.1  | 0.2 | 0.0 | 0.0 | 8.1   | 12.0 | 12.2 | 7.6  | 33.1   | 21.9 | 24.3 | 16.2 |
| 93-94 | 12.9   | 17.3 | 17.6 | 10.8 | 3.9   | 3.9 | 5.0 | 4.5 | 0.2  | 0.2 | 0.0 | 0.6 | 9.8   | 12.0 | 13.5 | 8.9  | 37.5   | 21.0 | 23.9 | 12.7 |
| 94-95 | 13.5   | 15.1 | 25.7 | 19.8 | 4.0   | 4.3 | 6.8 | 5.1 | 0.3  | 0.2 | 0.0 | 0.0 | 10.7  | 11.0 | 18.0 | 12.1 | 37.5   | 21.4 | 28.6 | 15.3 |
| 95-96 | 12.8   | 15.1 | 17.6 | 16.6 | 3.7   | 5.7 | 2.7 | 3.8 | 0.4  | 0.0 | 0.5 | 0.6 | 10.9  | 11.4 | 16.7 | 11.5 | 34.5   | 19.7 | 85.4 | 13.4 |
| 96-97 | 12.8   | 10.5 | 20.0 | 23.8 | 3.3   | 3.3 | 6.8 | 4.5 | 0.6  | 0.2 | 0.4 | 0.6 | 10.9  | 8.2  | 20.4 | 17.5 | 33.0   | 17.1 | 80.7 | 12.2 |
| 97-98 | 11.7   | 12.5 | 18.7 | 16.5 | 2.9   | 3.9 | 5.3 | 4.9 | 0.6  | 0.0 | 0.4 | 0.0 | 11.0  | 10.2 | 18.0 | 14.6 | 26.2   | 14.8 | 48.2 | 5.8  |
| 98-99 | 11.0   | 13.7 | 16.2 | 12.1 | 2.4   | 4.3 | 2.6 | 3.6 | 0.6  | 0.2 | 0.4 | 0.0 | 10.5  | 12.0 | 13.2 | 11.5 | 26.0   | 13.1 | 46.9 | 6.0  |
| 99-00 | 11.7   | 13.1 | 15.0 | 13.3 | 2.0   | 3.9 | 2.2 | 2.4 | 2.0  | 0.4 | 0.4 | 0.0 | 11.2  | 12.0 | 16.3 | 10.2 | 27.1   | 15.6 | 52.0 | 4.8  |
| 00-01 | 11.6   | 9.5  | 13.7 | 12.7 | 2.3   | 1.4 | 1.3 | 1.8 | 2.3  | 0.8 | 1.3 | 1.2 | 11.1  | 9.8  | 14.5 | 12.1 | 30.2   | 16.2 | 31.9 | 7.8  |
| 01-02 | 10.4   | 9.8  | 14.5 | 18.7 | 2.1   | 1.4 | 2.2 | 3.0 | 2.1  | 1.6 | 0.4 | 1.2 | 10.5  | 11.4 | 13.2 | 16.3 | 25.1   | 10.4 | 42.3 | 7.8  |
| 02-03 | 11.0   | 7.9  | 14.2 | 18.5 | 1.6   | 1.6 | 2.7 | 4.2 | 1.6  | 1.8 | 1.8 | 1.8 | 11.6  | 10.0 | 14.2 | 16.1 | 25.4   | 12.8 | 51.3 | 7.7  |
| 03-04 | 10.7   | 7.7  | 18.8 | 17.2 | 1.7   | 1.2 | 1.8 | 1.2 | 1.7  | 1.8 | 0.9 | 1.8 | 11.1  | 8.7  | 19.6 | 15.4 | 28.5   | 8.9  | 62.1 | 8.9  |
| 04-05 | 9.8    | 8.3  | 16.5 | 16.0 | 1.3   | 1.6 | 3.6 | 4.7 | 1.3  | 0.8 | 1.3 | 1.2 | 10.3  | 10.7 | 16.5 | 17.2 | 27.0   | 15.0 | 51.3 | 4.1  |
| 05-06 | 9.4    | 5.5  | 14.7 | 10.1 | 1.2   | 1.8 | 0.9 | 1.8 | 1.2  | 1.8 | 2.2 | 1.8 | 10.4  | 8.5  | 14.3 | 10.1 | 31.1   | 12.7 | 26.6 | 8.9  |
| 06-07 | 8.5    | 6.5  | 15.2 | 16.4 | 1.5   | 1.6 | 4.5 | 2.3 | 1.5  | 0.8 | 0.9 | 2.9 | 10.6  | 6.9  | 17.9 | 19.7 | 32.8   | 15.2 | 36.1 | 8.8  |
| 07-08 | 7.2    | 4.7  | 9.6  | 8.7  | 1.1   | 1.8 | 1.3 | 1.7 | 1.1  | 0.8 | 1.3 | 1.2 | 10.6  | 8.3  | 14.0 | 10.5 | 34.3   | 18.6 | 27.5 | 4.7  |
| 08-09 | 8.2    | 9.0  | 7.9  | 8.7  | 1.3   | 1.0 | 1.3 | 2.3 | 1.3  | 2.2 | 1.8 | 3.5 | 11.2  | 10.8 | 12.2 | 12.2 | 34.4   | 21.1 | 24.0 | 4.1  |

Table 1: UK Donor rates (deceased donors per million population) by organ type 1990-2009 (Pocock P. 2010).  
(E = England S = Scotland W = Wales NI = Northern Ireland)



1  
2  
3  
4  
5  
6  
7  
8  
9  
10  
11  
12  
13  
14  
15  
16  
17  
18  
19  
20  
21  
22  
23  
24  
25  
26  
27  
28  
29  
30  
31  
32  
33  
34  
35  
36  
37  
38  
39  
40  
41  
42  
43  
44  
45  
46  
47  
48  
49  
50  
51  
52  
53  
54  
55  
56  
57  
58  
59  
60

Table 1 shows 95 combinations of year and organ. For each combination and pair of regions, the differences in the proportions of donors (per million population  $\times 10^{-6}$ ) were tested for statistical significance at the 5% level using the appropriate z test for independent proportions.[4] Certain clear patterns were detected. With regards to the cornea, statistically significant differences were found between England and Scotland as well as England and Northern Ireland for all years and between Wales and Northern Ireland for all but two years (Table 2). The fewest significant differences in corneal donations occurred between Scotland and Northern Ireland. The patterns seen with corneal donations may reflect attitudes based on culture and tradition as well as on lack of awareness of what eye donation involves. In Northern Ireland, and to a lesser extent in Scotland, the tradition of wakes and burial remains strong. Disfiguring the face of a deceased loved one before burial by removing the eyeballs, is unlikely to be accepted.[5] There is no eye bank or retrieval centre in Northern Ireland and information regarding the effect of collecting eye tissue on facial appearance is not well explained. In Wales and England, where over 70% of deaths result in cremations (compared to around 60% of deaths in Scotland and 15% in Northern Ireland)[6], the issue of the facial appearance of the deceased is less important.

42  
43  
44  
45  
46  
47  
48  
49  
50  
51  
52  
53  
54  
55  
56  
57  
58  
59  
60

For around half of the years or more, statistically significant differences are evident in kidney and liver donations between Scotland and Wales (kidney: 11/19; liver: 9/19) and England and Wales (kidney: 10/19; liver 11/19) with the greater donations from Wales compared with the other two regions (Table 2). For both regional pairs (Scotland/England, England/Wales), the pattern of kidney and liver donations (i.e. whether differences are significant or not) were matched over most years. Comparison of Northern Ireland with Scotland and England showed 8/19 years for which kidney donations were significantly higher than for both Scotland and England. Fewer differences were found for liver donations: Scotland and Northern Ireland (6/19); England and Northern Ireland (5/19). Between Scotland and England

1 there were very few significant differences in kidney and liver donations and there were no  
2 significant differences for any year between Wales and Northern Ireland for kidney and liver  
3 donations. Similar trends in Northern Ireland and Wales and differences between these  
4 donations. Similar trends in Northern Ireland and Wales and differences between these  
5 regions and England and Scotland, in particular with regard to kidney donations, may reflect  
6 the way in which the regions approach the raising of public awareness. Bodies such as  
7 Donate Wales, Kidney Wales and the Northern Ireland Kidney Research Fund, actively  
8 promote kidney and organ donations in general. There is no comparable body for England  
9 alone; the various UK bodies (e.g. UK National Kidney Federation, British Liver Trust) and  
10 the Scottish Kidney Federation offer a great deal of support to patient groups and promote  
11 research activities but there appears to be less focus on raising awareness of organ donation  
12 than in Wales and Northern Ireland. It is also possible that awareness of the importance of  
13 donating these organs is highlighted when a kidney or liver donation is needed (and in the  
14 case of these organs may also be provided from a living donor who is most likely to be a  
15 relative), in the more tight-knit communities with family-based and kinship networks found  
16 in Northern Ireland and Wales.[7]

17  
18  
19  
20  
21  
22  
23  
24  
25  
26  
27  
28  
29  
30  
31  
32  
33  
34  
35  
36  
37  
38  
39  
40 In the case of lung and heart donations, there were very few significant differences between  
41 any of the regions over the nineteen year period (Table 2). Lung and heart donations have  
42 been very low in number in all regions across all the years and this may reflect the fact that  
43 heart beating donors, on which heart and most lung transplants depend have been decreasing  
44 for around a decade across the UK.[3]

| Year  | Kidney        |       |       |       |       |       | Heart                                                                                                                                                                                                                                                                                                                                                                                                                                                                                                                                                                                                  |       |       |       |       |       |
|-------|---------------|-------|-------|-------|-------|-------|--------------------------------------------------------------------------------------------------------------------------------------------------------------------------------------------------------------------------------------------------------------------------------------------------------------------------------------------------------------------------------------------------------------------------------------------------------------------------------------------------------------------------------------------------------------------------------------------------------|-------|-------|-------|-------|-------|
|       | zEW           | zES   | zEN   | zWS   | zWN   | zSN   | zEW                                                                                                                                                                                                                                                                                                                                                                                                                                                                                                                                                                                                    | zES   | zEN   | zWS   | zWN   | zSN   |
| 90-91 | -1.66         | -1.56 | -1.47 | 0.47  | -0.04 | -0.47 | -1.10                                                                                                                                                                                                                                                                                                                                                                                                                                                                                                                                                                                                  | 0.00  | 1.26  | 0.89  | 1.68  | 1.18  |
| 91-92 | -2.81         | -0.46 | -3.78 | 1.98  | -0.86 | -2.84 | -2.20                                                                                                                                                                                                                                                                                                                                                                                                                                                                                                                                                                                                  | 0.11  | -1.19 | 1.79  | 0.42  | -1.07 |
| 92-93 | -0.28         | -3.25 | -0.53 | -1.47 | -0.22 | 1.05  | -1.84                                                                                                                                                                                                                                                                                                                                                                                                                                                                                                                                                                                                  | -2.05 | 0.00  | 0.31  | 1.04  | 0.91  |
| 93-94 | -1.89         | -2.59 | 0.72  | 0.09  | 1.70  | 1.79  | -0.81                                                                                                                                                                                                                                                                                                                                                                                                                                                                                                                                                                                                  | 0.00  | -0.37 | 0.66  | 0.22  | -0.33 |
| 94-95 | -4.75         | -0.93 | -2.10 | 3.08  | 1.17  | -1.28 | -2.01                                                                                                                                                                                                                                                                                                                                                                                                                                                                                                                                                                                                  | -0.32 | -0.68 | 1.38  | 0.66  | -0.41 |
| 95-96 | -1.94         | -1.37 | -1.30 | 0.78  | 0.23  | -0.42 | 0.76                                                                                                                                                                                                                                                                                                                                                                                                                                                                                                                                                                                                   | -2.18 | -0.06 | -1.70 | -0.59 | 0.91  |
| 96-97 | -2.90         | 1.39  | -3.74 | 3.23  | -0.78 | -3.95 | -2.74                                                                                                                                                                                                                                                                                                                                                                                                                                                                                                                                                                                                  | 0.00  | -0.81 | 2.08  | 0.91  | -0.69 |
| 97-98 | -2.98         | -0.50 | -1.75 | 2.05  | 0.51  | -1.21 | -2.04                                                                                                                                                                                                                                                                                                                                                                                                                                                                                                                                                                                                  | -1.25 | -1.46 | 0.84  | 0.17  | -0.55 |
| 98-99 | -2.29         | -1.73 | -0.42 | 0.82  | 1.05  | 0.49  | -0.19                                                                                                                                                                                                                                                                                                                                                                                                                                                                                                                                                                                                  | -2.54 | -0.97 | -1.10 | -0.56 | 0.38  |
| 99-00 | -2.98         | -0.50 | -1.77 | 2.05  | 0.51  | -1.22 | 0.98                                                                                                                                                                                                                                                                                                                                                                                                                                                                                                                                                                                                   | 1.30  | 0.42  | -0.11 | -0.40 | -0.37 |
| 00-01 | -0.91         | 1.34  | -0.41 | 1.60  | 0.27  | -1.12 | -0.10                                                                                                                                                                                                                                                                                                                                                                                                                                                                                                                                                                                                  | 1.06  | -0.78 | 0.78  | -0.49 | -1.34 |
| 01-02 | -1.86         | 0.40  | -3.22 | 1.76  | -1.02 | -2.88 | -1.26                                                                                                                                                                                                                                                                                                                                                                                                                                                                                                                                                                                                  | 0.00  | -2.54 | 0.99  | -0.80 | -1.95 |
| 02-03 | -1.41         | 2.04  | -2.84 | 2.52  | -1.05 | -3.66 | -0.11                                                                                                                                                                                                                                                                                                                                                                                                                                                                                                                                                                                                  | 0.83  | 0.49  | 0.64  | 0.47  | 0.00  |
| 03-04 | -3.57         | 1.99  | -2.52 | 4.15  | 0.37  | -3.37 | -2.85                                                                                                                                                                                                                                                                                                                                                                                                                                                                                                                                                                                                  | -0.56 | -3.66 | 1.67  | -0.53 | -2.26 |
| 04-05 | -3.09         | 1.03  | -2.51 | 3.11  | 0.12  | -2.71 | 0.40                                                                                                                                                                                                                                                                                                                                                                                                                                                                                                                                                                                                   | -1.15 | -0.69 | -0.91 | -0.78 | 0.00  |
| 05-06 | -2.50         | 2.78  | -0.29 | 3.97  | 1.27  | -2.01 | -3.44                                                                                                                                                                                                                                                                                                                                                                                                                                                                                                                                                                                                  | -0.17 | -0.83 | 2.29  | 1.15  | -0.59 |
| 06-07 | -3.31         | 1.49  | -3.41 | 3.58  | -0.30 | -3.72 | -0.28                                                                                                                                                                                                                                                                                                                                                                                                                                                                                                                                                                                                  | -1.40 | -0.73 | -0.49 | -0.33 | 0.09  |
| 07-08 | -1.31         | 2.04  | -0.72 | 2.47  | 0.29  | -1.90 | 0.00                                                                                                                                                                                                                                                                                                                                                                                                                                                                                                                                                                                                   | 0.57  | -1.12 | 0.36  | -0.75 | -1.28 |
| 08-09 | 0.16          | -0.60 | -0.23 | -0.47 | -0.28 | 0.11  | -0.28                                                                                                                                                                                                                                                                                                                                                                                                                                                                                                                                                                                                  | -1.40 | -0.73 | -0.49 | -0.33 | 0.09  |
|       | <b>Lung</b>   |       |       |       |       |       | <b>Liver</b>                                                                                                                                                                                                                                                                                                                                                                                                                                                                                                                                                                                           |       |       |       |       |       |
|       | zEW           | zES   | zEN   | zWS   | zWN   | zSN   | zEW                                                                                                                                                                                                                                                                                                                                                                                                                                                                                                                                                                                                    | zES   | zEN   | zWS   | zWN   | zSN   |
| 90-91 | 0.00          | 0.00  | 0.00  | 0.00  | 0.00  | 0.00  | -1.53                                                                                                                                                                                                                                                                                                                                                                                                                                                                                                                                                                                                  | -1.90 | -0.55 | 0.17  | 0.51  | 0.43  |
| 91-92 | 0.66          | -0.92 | 0.56  | -0.94 | 0.00  | 0.79  | -2.60                                                                                                                                                                                                                                                                                                                                                                                                                                                                                                                                                                                                  | -0.08 | -3.52 | 2.00  | -0.66 | -2.64 |
| 92-93 | 0.47          | -0.65 | 0.40  | -0.67 | 0.00  | 0.56  | -2.08                                                                                                                                                                                                                                                                                                                                                                                                                                                                                                                                                                                                  | -2.88 | 0.22  | 0.07  | 1.37  | 1.46  |
| 93-94 | 0.67          | 0.00  | -1.07 | -0.67 | -1.15 | -0.81 | -1.71                                                                                                                                                                                                                                                                                                                                                                                                                                                                                                                                                                                                  | -1.49 | 0.36  | 0.53  | 1.30  | 1.01  |
| 94-95 | 0.82          | 0.40  | 0.69  | -0.67 | 0.00  | 0.56  | -3.20                                                                                                                                                                                                                                                                                                                                                                                                                                                                                                                                                                                                  | -0.20 | -0.53 | 2.40  | 1.43  | -0.36 |
| 95-96 | -0.23         | 1.43  | -0.39 | 1.60  | -0.13 | -1.75 | -2.53                                                                                                                                                                                                                                                                                                                                                                                                                                                                                                                                                                                                  | -0.32 | -0.22 | 1.83  | 1.31  | -0.03 |
| 96-97 | 0.38          | 1.15  | 0.00  | 0.49  | -0.28 | -0.81 | -4.12                                                                                                                                                                                                                                                                                                                                                                                                                                                                                                                                                                                                  | 1.78  | -2.44 | 4.40  | 0.63  | -3.16 |
| 97-98 | 0.38          | 1.76  | 0.99  | 1.44  | 0.80  | 0.00  | -3.07                                                                                                                                                                                                                                                                                                                                                                                                                                                                                                                                                                                                  | 0.52  | -1.35 | 2.76  | 0.81  | -1.46 |
| 98-99 | 0.38          | 1.15  | 0.99  | 0.49  | 0.81  | 0.57  | -1.22                                                                                                                                                                                                                                                                                                                                                                                                                                                                                                                                                                                                  | -0.99 | -0.39 | 0.43  | 0.47  | 0.16  |
| 99-00 | 1.70          | 2.53  | 1.82  | 0.00  | 0.81  | 0.81  | -2.22                                                                                                                                                                                                                                                                                                                                                                                                                                                                                                                                                                                                  | -0.51 | 0.38  | 1.48  | 1.61  | 0.59  |
| 00-01 | 0.98          | 2.20  | 0.93  | 0.64  | 0.09  | -0.47 | -2.28                                                                                                                                                                                                                                                                                                                                                                                                                                                                                                                                                                                                  | -0.58 | 0.34  | 1.48  | 1.61  | 0.59  |
| 01-02 | 1.76          | 0.75  | 0.79  | -1.36 | -0.91 | 0.37  | -1.22                                                                                                                                                                                                                                                                                                                                                                                                                                                                                                                                                                                                  | -0.60 | -2.25 | 0.65  | -0.80 | -1.55 |
| 02-03 | -0.23         | -0.34 | -0.20 | 0.00  | 0.00  | 0.00  | -1.12                                                                                                                                                                                                                                                                                                                                                                                                                                                                                                                                                                                                  | 1.02  | -1.66 | 1.57  | -0.48 | -2.01 |
| 03-04 | 0.91          | -0.16 | -0.10 | -0.91 | -0.78 | 0.00  | -3.68                                                                                                                                                                                                                                                                                                                                                                                                                                                                                                                                                                                                  | 1.56  | 1.64  | 3.91  | 0.98  | -2.34 |
| 04-05 | 0.00          | 0.96  | 0.11  | 0.64  | 0.09  | -0.47 | -2.79                                                                                                                                                                                                                                                                                                                                                                                                                                                                                                                                                                                                  | -0.27 | -2.72 | 2.05  | -0.17 | -2.08 |
| 05-06 | -1.31         | -1.15 | -0.69 | 0.36  | 0.28  | 0.00  | -1.76                                                                                                                                                                                                                                                                                                                                                                                                                                                                                                                                                                                                  | 1.27  | 0.12  | 2.25  | 1.17  | -0.60 |
| 06-07 | 0.72          | 1.25  | -1.44 | 0.14  | -1.48 | -2.05 | -3.24                                                                                                                                                                                                                                                                                                                                                                                                                                                                                                                                                                                                  | 2.48  | -3.52 | 4.28  | -0.41 | -4.53 |
| 07-08 | -0.28         | 0.62  | -0.12 | 0.64  | 0.09  | -0.48 | -1.54                                                                                                                                                                                                                                                                                                                                                                                                                                                                                                                                                                                                  | 1.54  | 0.04  | 2.26  | 0.98  | -0.84 |
| 08-09 | -0.80         | -1.89 | -2.63 | -0.35 | -1.06 | -0.93 | -0.44                                                                                                                                                                                                                                                                                                                                                                                                                                                                                                                                                                                                  | 0.26  | -0.38 | 0.52  | 0.00  | -0.48 |
|       | <b>Cornea</b> |       |       |       |       |       | <p><b>Key</b></p> <p>zEW is the z score for the difference between the proportions in England and Wales (a negative score indicates that the proportion was greater in Wales)</p> <p>zES = England with Scotland<br/>                     zEN = England with N. Ireland<br/>                     zWS = Wales with Scotland<br/>                     zWN = Wales with N. Ireland<br/>                     zSN = Scotland with N. Ireland</p> <p>An absolute value for z &gt; 1.96 indicates that the difference between two independent proportions is significant at 0.05 level (two-tailed test).</p> |       |       |       |       |       |
|       | zEW           | zES   | zEN   | zWS   | zWN   | zSN   |                                                                                                                                                                                                                                                                                                                                                                                                                                                                                                                                                                                                        |       |       |       |       |       |
| 90-91 | 3.09          | 6.88  | 4.22  | 1.83  | 1.75  | 0.49  |                                                                                                                                                                                                                                                                                                                                                                                                                                                                                                                                                                                                        |       |       |       |       |       |
| 91-92 | 0.08          | 7.04  | 3.55  | 5.06  | 3.05  | -0.52 |                                                                                                                                                                                                                                                                                                                                                                                                                                                                                                                                                                                                        |       |       |       |       |       |
| 92-93 | 25.08         | 38.24 | 21.66 | 0.63  | 1.70  | 1.38  |                                                                                                                                                                                                                                                                                                                                                                                                                                                                                                                                                                                                        |       |       |       |       |       |
| 93-94 | 1.00          | 2.69  | 3.51  | 0.77  | 2.45  | 2.08  |                                                                                                                                                                                                                                                                                                                                                                                                                                                                                                                                                                                                        |       |       |       |       |       |
| 94-95 | 2.13          | 5.77  | 4.51  | 1.84  | 2.65  | 1.50  |                                                                                                                                                                                                                                                                                                                                                                                                                                                                                                                                                                                                        |       |       |       |       |       |
| 95-96 | -12.24        | 5.53  | 4.47  | 12.98 | 9.26  | 1.62  |                                                                                                                                                                                                                                                                                                                                                                                                                                                                                                                                                                                                        |       |       |       |       |       |
| 96-97 | -11.74        | 6.09  | 4.51  | 13.11 | 9.08  | 1.34  |                                                                                                                                                                                                                                                                                                                                                                                                                                                                                                                                                                                                        |       |       |       |       |       |
| 97-98 | -6.22         | 4.91  | 5.05  | 8.38  | 7.46  | 2.81  |                                                                                                                                                                                                                                                                                                                                                                                                                                                                                                                                                                                                        |       |       |       |       |       |
| 98-99 | -5.95         | 5.57  | 5.02  | 8.74  | 7.34  | 2.35  |                                                                                                                                                                                                                                                                                                                                                                                                                                                                                                                                                                                                        |       |       |       |       |       |
| 99-00 | -6.91         | 4.85  | 5.50  | 8.82  | 8.16  | 3.36  |                                                                                                                                                                                                                                                                                                                                                                                                                                                                                                                                                                                                        |       |       |       |       |       |
| 00-01 | -0.46         | 5.61  | 5.23  | 4.29  | 5.06  | 2.50  |                                                                                                                                                                                                                                                                                                                                                                                                                                                                                                                                                                                                        |       |       |       |       |       |
| 01-02 | -4.99         | 6.50  | 4.43  | 8.90  | 6.42  | 0.93  |                                                                                                                                                                                                                                                                                                                                                                                                                                                                                                                                                                                                        |       |       |       |       |       |
| 02-03 | -7.41         | 5.51  | 4.50  | 9.72  | 7.45  | 1.68  |                                                                                                                                                                                                                                                                                                                                                                                                                                                                                                                                                                                                        |       |       |       |       |       |
| 03-04 | -8.99         | 8.13  | 4.75  | 13.20 | 8.34  | 0.00  |                                                                                                                                                                                                                                                                                                                                                                                                                                                                                                                                                                                                        |       |       |       |       |       |
| 04-05 | -6.72         | 5.05  | 5.71  | 8.85  | 8.32  | 3.50  |                                                                                                                                                                                                                                                                                                                                                                                                                                                                                                                                                                                                        |       |       |       |       |       |
| 05-06 | 1.19          | 7.27  | 5.15  | 4.21  | 3.99  | 1.25  |                                                                                                                                                                                                                                                                                                                                                                                                                                                                                                                                                                                                        |       |       |       |       |       |
| 06-07 | -0.84         | 6.76  | 5.42  | 5.60  | 5.43  | 1.95  |                                                                                                                                                                                                                                                                                                                                                                                                                                                                                                                                                                                                        |       |       |       |       |       |
| 07-08 | 1.73          | 5.89  | 6.61  | 2.42  | 5.37  | 4.06  |                                                                                                                                                                                                                                                                                                                                                                                                                                                                                                                                                                                                        |       |       |       |       |       |
| 08-09 | 2.64          | 4.97  | 6.76  | 0.78  | 5.02  | 4.70  |                                                                                                                                                                                                                                                                                                                                                                                                                                                                                                                                                                                                        |       |       |       |       |       |

1  
2  
3  
4  
5  
6  
7  
8  
9  
10  
11  
12  
13  
14  
15  
16  
17  
18  
19  
20  
21  
22  
23  
24  
25  
26  
27  
28  
29  
30  
31  
32  
33  
34  
35  
36  
37  
38  
39  
40  
41  
42  
43  
44  
45  
46  
47  
48  
49  
50  
51  
52  
53  
54  
55  
56  
57  
58  
59  
60

Table 2 Statistical analyses using z-scores comparing differences in organ donation between each of the four regions: England, Scotland, Wales and Northern Ireland for five organs

*Can parallels be drawn from the EU?*

It has been suggested that at least 20-30 deceased donors per million population would be necessary to meet the UK's increasing demands.[8] The British Medical Association called for changes in legislation, suggesting a system of presumed consent that allows for objections of relatives.[9] The Organ Donation Taskforce was commissioned in 2008 to consider the potential effects of such legislation and concluded that a change to presumed consent at this time was unlikely to increase organ donation rates, may incur prohibitive costs and could result in a backlash; other factors needed to be considered before introducing legislative change.[10]

Bird and Harris modelled situations with varying relative refusal rates and drew on comparisons with EU countries that already adopted presumed consent systems.[11] However, presumed consent for organ donation has been implemented with varying effect in the EU. Adoption and successful implementation of laws in one country should not be taken as a guarantee of similar success in another. Hence, though Sweden applies presumed consent, its donation rate in 2009, at 13.8 deceased donors per million population,[12] was comparable to that of Germany (14.5 deceased donors per million population) and Denmark (14.0 deceased donors per million population) (Sønder S. 2010); both of which require informed consent (Figure 2). The figures available for Ireland, where informed consent is needed, were 21.2 deceased donors per million population in 2009.[13] The nation with the highest donor rate (34.4 deceased donors per million population in 2009)[14], and one often cited as evidence of successful implementation of presumed consent legislation[15], is Spain which operates a "soft" form of presumed consent where next of kin can object to organ

1 donation[14-15]. Yet, the impact of the legislation has been questioned and the high rate of  
2 donor activity attributed to the “Spanish Model”[14-15] that demands an integrated approach  
3 with dedicated transplant co-ordinators, mainly intensive care physicians, involved in  
4 procurement[15]. This highly coordinated network and the respect for autonomy given to the  
5 individual and relatives, is credited with improving donation rates of 14.3 deceased donors  
6 per million population in 1989 to rates of 33-35 deceased donors per million population in  
7 recent years.[14-15] The majority of donations in Spain are from heart-beating donors in  
8 intensive care; live organ donation and that from non-heart beating donors is relatively  
9 low[15]. The converse is true in the UK and estimates suggest that even if a theoretical upper  
10 limit were reached, with present facilities and practices, heart beating donor numbers in the  
11 UK would only reach half of those in Spain.[15] Given that Spain introduced presumed  
12 consent in 1979[2], it is clear that a legislative change alone was not sufficient to improve  
13 donation rates. It is notable that Spain achieves a significantly higher rate of donation than  
14 does Austria [12] which relies upon a “hard” approach in which views of relatives are not  
15 routinely sought.

16  
17  
18  
19  
20  
21  
22  
23  
24  
25  
26  
27  
28  
29  
30  
31  
32  
33  
34  
35  
36  
37  
38 Comparisons across the EU further indicate that whilst a country may have relatively low  
39 overall donation rates, for certain organs the trend may be reversed. Sweden lags behind  
40 countries like Austria, Belgium, Germany and the Netherlands with regard to overall  
41 deceased donations but has had the highest kidney donation rate for the majority of the past  
42 13 years (Sønder S. 2010).[12]

## 53 Conclusions

54  
55  
56 Data from the four UK regions show patterns of similarities and differences that vary with  
57 type of organ donated. Further exploration of underlying regional differences, organisational  
58 issues and practices and attitudes that may affect organ donation, particularly with respect to  
59  
60

1 certain organs, should be undertaken before legislative measures are considered. Comparison  
2 of EU nations, and particularly Spain, indicates that improvement of donation rates is  
3 unlikely to be achieved by introducing new legislation alone.  
4  
5  
6  
7  
8

9  
10 **Provenance/Contributorship:** Barbara Pierscionek is a Professor of Vision Science at the  
11 School of Biomedical Science, University of Ulster. She is qualified in science and law,  
12 teaches ethics and law and researches the biology and physics of ageing as well as healthcare  
13 ethics and presumed consent. Gordon Rae is a Professor of Psychology at the School of  
14 Psychology, University of Ulster, trained in mathematics and statistics as well as psychology  
15 and his research interests include applying statistical methods to psychology and medicine.  
16  
17 Carol McClenahan is a lecturer in Psychology at the School of Psychology, University of  
18 Ulster. Her research expertise is in attitude and behavioural change in relation to health. She  
19 also has an interest in ethics in psychology and health. Donal McGlade is currently  
20 undertaking a PhD on attitudes that determine behaviour with respect to organ donation. All  
21 authors were involved in preparation of the manuscript. Barbara Pierscionek is the guarantor.  
22  
23  
24  
25  
26  
27  
28  
29  
30  
31  
32  
33  
34  
35  
36  
37  
38  
39

40 “All authors have completed the Unified Competing Interest form at  
41 [www.icmje.org/coi\\_disclosure.pdf](http://www.icmje.org/coi_disclosure.pdf) (available on request from the corresponding author)  
42 (URL) and declare that all authors had: (1) No financial support for the submitted work from  
43 anyone other than their employer; (2) No financial relationships with commercial entities  
44 that might have an interest in the submitted work; (3) No spouses, partners, or children with  
45 relationships with commercial entities that might have an interest in the submitted work; (4)  
46 No Non-financial interests that may be relevant to the submitted work.”  
47  
48  
49  
50  
51  
52  
53  
54  
55  
56  
57  
58

59 “This research received no specific grant from any funding agency in the public, commercial  
60 or not-for-profit sectors.”

1  
2  
3  
4 “The Corresponding Author has the right to grant on behalf of all authors and does grant on  
5  
6 behalf of all authors, an exclusive licence (or non-exclusive for government employees) on a  
7  
8 worldwide basis to the BMJ Group and co-owners or contracting owning societies (where  
9  
10 published by the BMJ Group on their behalf), and its Licensees to permit this article (if  
11  
12 accepted) to be published in BMJ Open and any other BMJ Group products and to exploit all  
13  
14 subsidiary rights, as set out in our licence.”  
15  
16  
17  
18  
19  
20  
21

## 22 References

- 23  
24  
25 1. Murphy P, Smith M. A historic opportunity to improve organ donation in the UK. *Br J*  
26  
27 *Anaesth* 2008;100:735-737.  
28
- 29  
30 2. Gabel H. Organ donor registers. *Curr Opin Organ Transplant* 2006;11:187-193.  
31
- 32  
33 3. NHS Blood & Transplant. The NHS organ donor register. Bristol: NHS Blood &  
34  
35 Transplant; 2009.  
36
- 37  
38 4. Altman DG. Practical Statistics for Medical Research. London: Chapman & Hall  
39  
40 1991:234-235.  
41
- 42  
43 5. Kent B, Owens RG. Conflicting attitudes to corneal and organ donation: a study of  
44  
45 nurses attitudes to organ donation. *Int J Nurs Stud* 1995;32:484-492.  
46
- 47  
48 6. The Cremation Society of Great Britain. Table of cremations carried out in the United  
49  
50 Kingdom [Internet]. 2008 [updated 2010 Oct 27; cited 2010 Oct 27]. Available from:  
51  
52 <http://www.srgw.demon.co.uk/cremsoc/>  
53
- 54  
55 7. Charles N, Davies CA. Studying the particular, illuminating the general: community  
56  
57 studies and community in Wales. *Sociol Rev* 2005;53:672-690.  
58
- 59  
60 8. Cameron S, Forsythe J. How can we improve organ donation rates? Research into the  
61  
62 identification of factors which may influence the variation. *Nefrologia* 2001;21:68-77.

- 1  
2  
3  
4  
5  
6  
7  
8  
9  
10  
11  
12  
13  
14  
15  
16  
17  
18  
19  
20  
21  
22  
23  
24  
25  
26  
27  
28  
29  
30  
31  
32  
33  
34  
35  
36  
37  
38  
39  
40  
41  
42  
43  
44  
45  
46  
47  
48  
49  
50  
51  
52  
53  
54  
55  
56  
57  
58  
59  
60  
9. British Medical Association Medical Ethics Committee. Organ donation in the 21<sup>st</sup> century: Time for a consolidated approach. London: British Medical Association; 2000.
10. Organ Donation Taskforce. The potential impact of an opt out system for organ donation in the UK: an independent report from the Organ Donation Taskforce. UK Department of Health; 2008.
11. Bird SM, Harris J. Time to move to presumed consent for organ donation. *BMJ* 2010;340:c2188.
12. Cohen B, Persijn G. Annual Report 1997-2009. Eurotransplant International Foundation; 1997-2009.
13. Organ Procurement Service. Annual Report 2008-2009. Dublin: Organ Procurement Service; 2008-2009.
14. Matesanz R, Marazuela R, Domínguez-Gil B, et al. The 40 donors per million population plan: an action plan for improvement of organ donation and transplantation in Spain. *Transplant Proc* 2009;41:3453-3456.
15. Fabre J, Murphy P, Matesanz R. Presumed consent: a distraction in the quest for increasing rates of organ donation. *BMJ* 2010;341:c4973



**Figure captions**

Figure 1: a) Organ donor registration rates in England, Wales, Scotland and Northern Ireland 1994-2009 (Pocock P. 2010) b) Organ donation rates in England, Wales, Scotland and Northern Ireland 1990-2009 (Pocock P. 2010)

Figure 2: Organ donor rates in selected EU countries 1997-2009.[13] (Sønder S. 2010)

For peer review only

1  
2  
3  
4  
5  
6  
7  
8  
9  
10  
11  
12  
13  
14  
15  
16  
17  
18  
19  
20  
21  
22  
23  
24  
25  
26  
27  
28  
29  
30  
31  
32  
33  
34  
35  
36  
37  
38  
39  
40  
41  
42  
43  
44  
45  
46  
47  
48  
49  
50  
51  
52  
53  
54  
55  
56  
57  
58  
59  
60

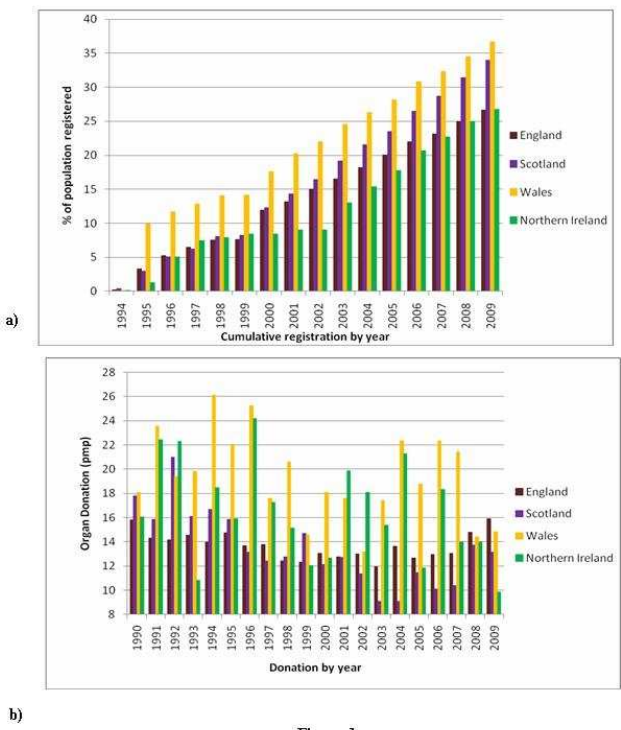

Figure 1

254x190mm (96 x 96 DPI)

ew only

1  
2  
3  
4  
5  
6  
7  
8  
9  
10  
11  
12  
13  
14  
15  
16  
17  
18  
19  
20  
21  
22  
23  
24  
25  
26  
27  
28  
29  
30  
31  
32  
33  
34  
35  
36  
37  
38  
39  
40  
41  
42  
43  
44  
45  
46  
47  
48  
49  
50  
51  
52  
53  
54  
55  
56  
57  
58  
59  
60

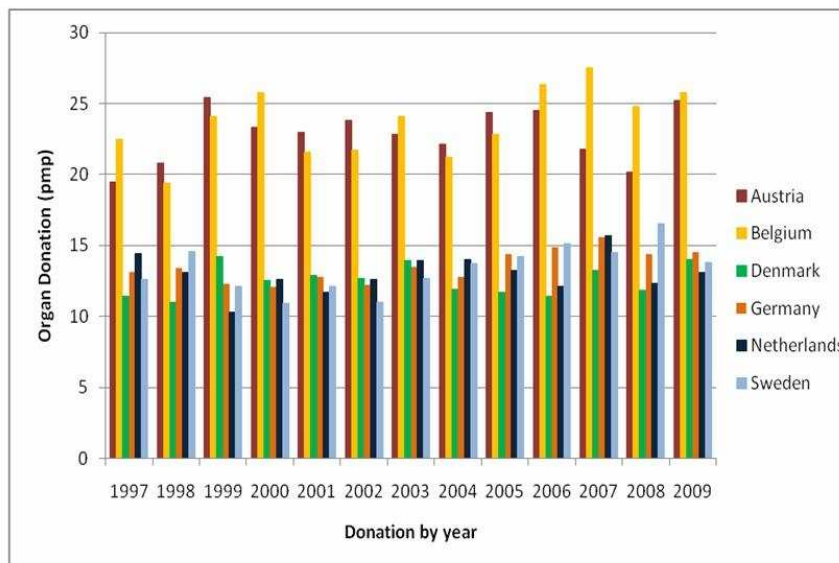

Figure 2

254x190mm (96 x 96 DPI)

ew only

## ■ Research review guidelines : modified from RATS guidelines

| ASK THIS OF THE MANUSCRIPT                                                                                                                                                                                                             | THIS SHOULD BE INCLUDED IN THE MANUSCRIPT                                                                                                                                                         | ✓<br><>           |
|----------------------------------------------------------------------------------------------------------------------------------------------------------------------------------------------------------------------------------------|---------------------------------------------------------------------------------------------------------------------------------------------------------------------------------------------------|-------------------|
| <p><b>R Relevance of study question</b></p> <p>Is the research question interesting?</p> <p>Is the research question relevant to clinical practice, public health, or policy? <i>It is relevant to policy</i></p>                      | <p>Research question explicitly stated</p> <p>Research question justified and linked to the existing knowledge base (empirical research, theory, policy)</p>                                      | <p>✓</p> <p>✓</p> |
| <p><b>A Appropriateness of the method</b></p> <p>Is the methodology used the best approach for the study aims?</p>                                                                                                                     | <p>Study design described and justified : <i>data for all organ donations and registrations was required in order to compare trends across the four UK regions.</i></p>                           | <p>✓</p>          |
| <p><b>T Transparency of procedures</b></p>                                                                                                                                                                                             |                                                                                                                                                                                                   |                   |
| <p><i>Data collection</i></p> <p>Was collection of data systematic and comprehensive?</p> <p>Why and when was data collection stopped, and is this reasonable?</p>                                                                     | <p>Method (s) outlined : <i>all available data from centralized sources collected</i></p> <p>End of data collection justified and described: <i>all available complete data was collected</i></p> | <p>✓</p> <p>✓</p> |
| <p><b>S Soundness of interpretive approach</b></p> <p><i>Analysis</i></p> <p>Is the type of analysis appropriate for the type of study?</p> <p>Are the interpretations clearly presented and adequately supported by the evidence?</p> | <p>Analytic approach described in depth and justified</p> <p>Statistical analysis conducted using appropriate test</p> <p>Analysis, presentation and interpretation provided</p>                  | <p>✓</p> <p>✓</p> |
| <p><i>Discussion and presentation</i></p>                                                                                                                                                                                              |                                                                                                                                                                                                   |                   |

1  
2  
3  
4  
5  
6  
7  
8  
9  
10  
11  
12  
13  
14  
15  
16  
17  
18  
19  
20  
21  
22  
23  
24  
25  
26  
27  
28  
29  
30  
31  
32  
33  
34  
35  
36  
37  
38  
39  
40  
41  
42  
43  
44  
45  
46  
47  
48  
49  
50  
51  
52  
53  
54  
55  
56  
57  
58  
59  
60

Is adequate account taken of previous knowledge and how the findings add?

Findings presented with reference to existing literature, and how they contribute

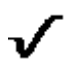

Is the manuscript well written and accessible?

Evidence of following guidelines (format, word count)  
Written for a health sciences audience

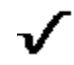

For peer review only

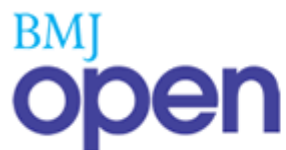

**Consent to organ donation should not be presumed before exploring regional variations**

|                               |                                                                                                                                                                                                                                      |
|-------------------------------|--------------------------------------------------------------------------------------------------------------------------------------------------------------------------------------------------------------------------------------|
| Journal:                      | <i>BMJ Open</i>                                                                                                                                                                                                                      |
| Manuscript ID:                | BMJ Open.2010.000055.R1                                                                                                                                                                                                              |
| Article Type:                 | Research                                                                                                                                                                                                                             |
| Date Submitted by the Author: | 13-May-2011                                                                                                                                                                                                                          |
| Complete List of Authors:     | McGlade, Donal; University of Ulster, Biomedical Sciences<br>Rae, Gordon; University of Ulster, Psychology<br>McClenahan, Carol; University of Ulster, Psychology<br>Pierscionek, Barbara; University of Ulster, Biomedical Sciences |
| <b>Subject Heading</b>:       | Health policy                                                                                                                                                                                                                        |
| Keywords:                     | Health policy < HEALTH SERVICES ADMINISTRATION & MANAGEMENT, Transplant medicine < INTERNAL MEDICINE, LAW (see Medical Law), organ donation, presumed consent, UK regional variations                                                |
|                               |                                                                                                                                                                                                                                      |

SCHOLARONE™  
Manuscripts

only

1  
2  
3 **Consent to organ donation should not be presumed before exploring regional variations**  
4

5  
6 *(secondary analysis of databases)*  
7

8  
9 Donal McGlade[1], Gordon Rae[2], Carol McClenahan[2], Barbara Pierscionek[1,\*]  
10

- 11  
12 1. School of Biomedical Science, University of Ulster, Cromore Road  
13 Coleraine, BT52 1SA  
14 2. School of Psychology, University of Ulster, Cromore Road, Coleraine,  
15 BT52 1SA  
16

17  
18  
19  
20  
21  
22 \*Corresponding author email [b.pierscionek@ulster.ac.uk](mailto:b.pierscionek@ulster.ac.uk) telephone: 02870123293  
23  
24  
25  
26  
27  
28  
29  
30  
31

32 Key words: *organ donation, presumed consent, UK regional variations, EU organ donation*  
33  
34

35 Word count: 2138 words  
36  
37  
38  
39  
40  
41  
42  
43  
44  
45  
46  
47  
48  
49  
50  
51  
52  
53  
54  
55  
56  
57  
58  
59  
60

1  
2  
3  
4  
5  
6  
7  
8  
9  
10  
11  
12  
13  
14  
15  
16  
17  
18  
19  
20  
21  
22  
23  
24  
25  
26  
27  
28  
29  
30  
31  
32  
33  
34  
35  
36  
37  
38  
39  
40  
41  
42  
43  
44  
45  
46  
47  
48  
49  
50  
51  
52  
53  
54  
55  
56  
57  
58  
59  
60

**Objectives:** To explore regional variations in donation of cadaveric solid organs and tissues across the four devolved health administrations of the UK (England, Scotland, Wales & Northern Ireland).

**Design:** A secondary analysis of databases from NHS Blood & Transplant (1990-2009) and from the National Organ Procurement Service for the Republic of Ireland, Eurotransplant International Foundation and Scandiatransplant.

**Results:** Statistically significant differences using Chi-square and post hoc analyses were found for the cornea between England and Scotland as well as England and Northern Ireland for every year of the nineteen years investigated and between Wales and Northern Ireland for all but five years. The fewest significant differences occurred between Scotland and Northern Ireland. Whilst Chi-square analysis showed differences across the four regions in kidney and liver donation rates over 10 out of the 19 years (kidney) and 7 out of the 19 years (liver), very few of these resulted in statistical significance following post hoc comparisons. There were no significant post hoc differences between any of the regions for lung and heart donations.

**Conclusion:** Temporal variations in organ donation rates over the last two decades vary in the four UK regions with type of organ donated. For heart, lung, kidney and liver the differences in any given year were not statistically significant. Corneal donation rates show highly significant regional variations with the greatest number of differences occurring between England and Northern Ireland and England and Scotland. The lowest number of differences was found between Northern Ireland and Scotland. Further exploration of underlying factors, organisational issues and practices and attitudes that may affect corneal donation, needs to be undertaken.



**Article focus:**

- To investigate organ donation of cadaveric solid organs and tissues across the four devolved health administrations of the UK and how they vary with time;
- To consider reasons for regional variations and those related to organ type, drawing on regional differences in culture and practice and on findings in other EU countries.

**Key messages:**

- organ donation and registration rates vary with time across the four regions of UK;
- for any given year, statistically significant differences in corneal donation rates exist across the four regions;
- Scotland and Northern Ireland show the fewest differences in corneal donation rates

**Strengths & limitations:**

The strengths of this article are its novelty, as this is the first article that has analysed data across the UK and shown patterns in donation rates in the four regions over the last two decades; its timeliness given the shortfall in organ donations and the continuing debate about altering legislation to permit presumed consent and its importance in investigating for which organs regional differences exist and for which organs donation rates are similar. The limitation of this work was that data from other EU countries, for the entire time period investigated, were not available.

## Introduction

Approximately 80-90% of the UK population support the principle of organ donation[1], yet, only 28% of the population carry an organ donor card.[2] Despite advances in transplantation medicine, organ shortage is the single most limiting factor preventing potential recipients from receiving the benefits of transplantation.[3] If the overwhelming support for organ donation could be directly translated into a willingness to donate, this should bode well for a presumed consent system (allowing organs to be used for transplantation unless the individual has explicitly objected). However, interpretation of these findings is far from simple. The authors argue that before considering a presumed consent system, differences in donation and registration rates for different organs in the four regions of the UK need to be investigated and reasons for any differences explored. Without such research, a nationally imposed system for all organs may fail or create regional inequalities. This paper presents an analysis of data of organ donation and registration in the four regions of the UK for five organ types: kidney, liver, heart, lung and cornea in order to determine whether significant differences exist across the four regions and whether these vary depending on the organ. Comparisons are made to European nations that have adopted presumed consent as well as to those that have not.

## Methods

Information about all organ donations and registration in the four regions of the UK: England, Scotland, Wales and Northern Ireland was obtained from NHS Blood & Transplant for all available years: from 1990-2009.[2] Data from other European nations was provided from the National Organ Procurement Service for the Republic of Ireland [4], Eurotransplant International Foundation [5] and Scandiatransplant [6]. Statistical analysis of the data was conducted using a procedure developed by Zar.[7]

## Results and Discussion

### *Regional variations in registration and donation*

The UK currently operates a system of informed consent requiring individuals who wish to donate, to formally register their intention on a centralised register and to carry an organ donor card. Figure 1a shows that since the organ donor register was first launched in 1994, Wales has consistently outperformed other parts of the UK in terms of the percentage of population registered, with Scotland in second position, England third and Northern Ireland last. (A caveat is that although records are updated periodically to remove those who have died subsequent to being registered, organ donor registration rates may still include some entries of deceased individuals. This should not, however, affect regional variations.)

When the registration rates are compared to donation rates, the trends are somewhat different.[2] The rate of organ donation is consistently higher in Wales than the UK average for the majority of the last 20 years (Figure 1b). Donation rates in Northern Ireland are the second highest, achieving a higher than UK average in 13 of those years, with Scotland achieving this in 6 years and England capable of achieving this in only 3 years. So whilst registration and donation are both highest in Wales, amongst the other parts of the UK registration and donation do not follow similar trends. In Northern Ireland, for example, where willingness to register as an organ donor is lower than any other UK region, the organ donation rate is generally higher than in England or Scotland. It is also notable that whilst England exhibits the least variation in organ donation over the last two decades, Scotland shows an overall decrease in donation with trends in Wales and Northern Ireland varying from year to year with the greatest fluctuations in the latter.[2]

1  
2  
3  
4 *Variations in donation according to organ type*  
5

6  
7 Masked by general variations in donation are the figures for individual organs. Table 1 shows  
8  
9 the rate of donation for each region of the UK for different organs.[2] The rate of kidney  
10  
11 donation has been consistently highest in Wales for most of the past 20 years. Northern  
12  
13 Ireland contributed the second highest rate of donation followed by England and Scotland  
14  
15 respectively. Similar regional variations in donation are seen for the liver. With respect to  
16  
17 heart donation, Wales was the region with the highest overall donation rate until 1998 when it  
18  
19 was overtaken by Scotland and/or Northern Ireland with the exception of 2006-2007.  
20  
21 Northern Ireland had the second highest rate of donation, Scotland third and England the  
22  
23 lowest rate. The overall rate of heart donation has fallen dramatically over the twenty year  
24  
25 period for Wales, Scotland and England; Northern Ireland shows fluctuations with no  
26  
27 consistent trend.  
28  
29  
30  
31  
32  
33  
34  
35  
36

37 In contrast to falling heart donation rates, the rate of lung donation has risen since 1990, with  
38  
39 Northern Ireland being the greatest contributor over most of this period.[2] The overall  
40  
41 numbers, however, are low and comparable to those of heart donation. The pattern for corneal  
42  
43 donations shows a greater consistency for most regions except Wales which contributed  
44  
45 significantly more corneal tissue than the other regions between 1995 and 2005 but  
46  
47 subsequently decreased to levels comparable to pre-1995. England has the second highest  
48  
49 donation rate and Northern Ireland is the lowest for every year over the last two decades.  
50  
51  
52  
53  
54  
55  
56  
57  
58  
59  
60

1  
2  
3  
4  
5  
6  
7  
8  
9  
10  
11  
12  
13  
14  
15  
16  
17  
18  
19  
20  
21  
22  
23  
24  
25  
26  
27  
28  
29  
30  
31  
32  
33  
34  
35  
36  
37  
38  
39  
40  
41  
42  
43  
44  
45  
46  
47  
48  
49  
50  
51  
52  
53  
54  
55  
56  
57  
58  
59  
60

|       | Kidney |      |      |      | Heart |     |     |     | Lung |     |     |     | Liver |      |      |      | Cornea |      |      |      |
|-------|--------|------|------|------|-------|-----|-----|-----|------|-----|-----|-----|-------|------|------|------|--------|------|------|------|
| Year  | E      | S    | W    | NI   | E     | S   | W   | NI  | E    | S   | W   | NI  | E     | S    | W    | NI   | E      | S    | W    | NI   |
| 90-91 | 14.6   | 17.4 | 19.0 | 19.2 | 3.9   | 3.9 | 5.4 | 1.9 | 0.0  | 0.0 | 0.0 | 0.0 | 6.0   | 8.2  | 8.6  | 7.1  | 27.8   | 11.4 | 16.7 | 9.9  |
| 91-92 | 13.9   | 14.7 | 21.2 | 25.5 | 3.8   | 3.7 | 6.8 | 5.7 | 0.2  | 0.4 | 0.0 | 0.0 | 7.3   | 7.4  | 12.2 | 14.7 | 29.6   | 12.3 | 29.3 | 14.0 |
| 92-93 | 13.7   | 19.4 | 14.4 | 15.3 | 3.8   | 5.7 | 6.3 | 3.8 | 0.1  | 0.2 | 0.0 | 0.0 | 8.1   | 12.0 | 12.2 | 7.6  | 33.1   | 21.9 | 24.3 | 16.2 |
| 93-94 | 12.9   | 17.3 | 17.6 | 10.8 | 3.9   | 3.9 | 5.0 | 4.5 | 0.2  | 0.2 | 0.0 | 0.6 | 9.8   | 12.0 | 13.5 | 8.9  | 37.5   | 21.0 | 23.9 | 12.7 |
| 94-95 | 13.5   | 15.1 | 25.7 | 19.8 | 4.0   | 4.3 | 6.8 | 5.1 | 0.3  | 0.2 | 0.0 | 0.0 | 10.7  | 11.0 | 18.0 | 12.1 | 37.5   | 21.4 | 28.6 | 15.3 |
| 95-96 | 12.8   | 15.1 | 17.6 | 16.6 | 3.7   | 5.7 | 2.7 | 3.8 | 0.4  | 0.0 | 0.5 | 0.6 | 10.9  | 11.4 | 16.7 | 11.5 | 34.5   | 19.7 | 85.4 | 13.4 |
| 96-97 | 12.8   | 10.5 | 20.0 | 23.8 | 3.3   | 3.3 | 6.8 | 4.5 | 0.6  | 0.2 | 0.4 | 0.6 | 10.9  | 8.2  | 20.4 | 17.5 | 33.0   | 17.1 | 80.7 | 12.2 |
| 97-98 | 11.7   | 12.5 | 18.7 | 16.5 | 2.9   | 3.9 | 5.3 | 4.9 | 0.6  | 0.0 | 0.4 | 0.0 | 11.0  | 10.2 | 18.0 | 14.6 | 26.2   | 14.8 | 48.2 | 5.8  |
| 98-99 | 11.0   | 13.7 | 16.2 | 12.1 | 2.4   | 4.3 | 2.6 | 3.6 | 0.6  | 0.2 | 0.4 | 0.0 | 10.5  | 12.0 | 13.2 | 11.5 | 26.0   | 13.1 | 46.9 | 6.0  |
| 99-00 | 11.7   | 13.1 | 15.0 | 13.3 | 2.0   | 3.9 | 2.2 | 2.4 | 2.0  | 0.4 | 0.4 | 0.0 | 11.2  | 12.0 | 16.3 | 10.2 | 27.1   | 15.6 | 52.0 | 4.8  |
| 00-01 | 11.6   | 9.5  | 13.7 | 12.7 | 2.3   | 1.4 | 1.3 | 1.8 | 2.3  | 0.8 | 1.3 | 1.2 | 11.1  | 9.8  | 14.5 | 12.1 | 30.2   | 16.2 | 31.9 | 7.8  |
| 01-02 | 10.4   | 9.8  | 14.5 | 18.7 | 2.1   | 1.4 | 2.2 | 3.0 | 2.1  | 1.6 | 0.4 | 1.2 | 10.5  | 11.4 | 13.2 | 16.3 | 25.1   | 10.4 | 42.3 | 7.8  |
| 02-03 | 11.0   | 7.9  | 14.2 | 18.5 | 1.6   | 1.6 | 2.7 | 4.2 | 1.6  | 1.8 | 1.8 | 1.8 | 11.6  | 10.0 | 14.2 | 16.1 | 25.4   | 12.8 | 51.3 | 7.7  |
| 03-04 | 10.7   | 7.7  | 18.8 | 17.2 | 1.7   | 1.2 | 1.8 | 1.2 | 1.7  | 1.8 | 0.9 | 1.8 | 11.1  | 8.7  | 19.6 | 15.4 | 28.5   | 8.9  | 62.1 | 8.9  |
| 04-05 | 9.8    | 8.3  | 16.5 | 16.0 | 1.3   | 1.6 | 3.6 | 4.7 | 1.3  | 0.8 | 1.3 | 1.2 | 10.3  | 10.7 | 16.5 | 17.2 | 27.0   | 15.0 | 51.3 | 4.1  |
| 05-06 | 9.4    | 5.5  | 14.7 | 10.1 | 1.2   | 1.8 | 0.9 | 1.8 | 1.2  | 1.8 | 2.2 | 1.8 | 10.4  | 8.5  | 14.3 | 10.1 | 31.1   | 12.7 | 26.6 | 8.9  |
| 06-07 | 8.5    | 6.5  | 15.2 | 16.4 | 1.5   | 1.6 | 4.5 | 2.3 | 1.5  | 0.8 | 0.9 | 2.9 | 10.6  | 6.9  | 17.9 | 19.7 | 32.8   | 15.2 | 36.1 | 8.8  |
| 07-08 | 7.2    | 4.7  | 9.6  | 8.7  | 1.1   | 1.8 | 1.3 | 1.7 | 1.1  | 0.8 | 1.3 | 1.2 | 10.6  | 8.3  | 14.0 | 10.5 | 34.3   | 18.6 | 27.5 | 4.7  |
| 08-09 | 8.2    | 9.0  | 7.9  | 8.7  | 1.3   | 1.0 | 1.3 | 2.3 | 1.3  | 2.2 | 1.8 | 3.5 | 11.2  | 10.8 | 12.2 | 12.2 | 34.4   | 21.1 | 24.0 | 4.1  |

Table 1: UK Donor rates (deceased donors per million population) by organ type 1990-2009.[2]  
(E = England S = Scotland W = Wales NI = Northern Ireland)

1  
2  
3 Table 1 shows 95 combinations of year and organ. For each combination and pair of regions,  
4 the differences in the proportions of donors were tested for statistical significance. The  
5 sample sizes used to obtain these proportions is obtained by multiplying the entries in Table 1  
6  
7 by the size of each country's population in millions for the relevant year.[2] In order to  
8  
9 reduce a proliferation of Type I errors the procedure described by Zar [7] was adopted. The  
10  
11 first step of this procedure involved carrying out a Chi-square test to test the null hypothesis:  
12  
13 that the population proportions for each country are equal. If the null hypothesis is rejected,  
14  
15 Tukey's HSD (Honestly Significant Difference) is applied to pairs of proportions after  
16  
17 carrying out a Freeman-Tukey averaged double arcsine transformation. In order to obtain a  
18  
19 balance between Type I and Type II errors, the significance level adopted for both the Chi-  
20  
21 square test and the Studentised range statistic (q) was 0.01. As noted in Table 2, using this  
22  
23 two stage procedure it is possible for the Chi-square test to be significant but for none of the  
24  
25 subsequent post hoc comparison tests to be significant due to the conservative nature of the  
26  
27 latter. (In Table 2, a row of six Xs for any combination of organ and year denotes  
28  
29 comparisons where Chi-square indicated significance but each of the post hoc analyses  
30  
31 showed no significance).

32  
33  
34  
35  
36  
37  
38  
39  
40  
41  
42  
43  
44 Certain clear patterns were detected. With regards to the cornea, statistically significant  
45  
46 differences were found between England and Scotland as well as England and Northern  
47  
48 Ireland for all years and between Wales and Northern Ireland for all but five years (Table 2).  
49  
50 Where significance was found, Scotland and Northern Ireland had lower donation rates than  
51  
52 England and Wales and the fewest significant differences in corneal donations occurred  
53  
54 between Scotland and Northern Ireland (4 out of the 19 years).  
55  
56  
57  
58  
59  
60

1 The patterns seen with corneal donations may reflect attitudes based on culture and tradition  
2 as well as on lack of awareness of what eye donation involves. In Northern Ireland, and to a  
3 lesser extent in Scotland, the tradition of wakes and burial remains strong. Disfiguring the  
4 face of a deceased loved one before burial by removing the eyeballs, is unlikely to be  
5 accepted.[8] There is no eye bank or retrieval centre in Northern Ireland and information  
6 regarding the effect of collecting eye tissue on facial appearance is not well explained. In  
7 Wales and England, where over 70% of deaths result in cremations (compared to around 60%  
8 of deaths in Scotland and 15% in Northern Ireland)[9], the issue of the facial appearance of  
9 the deceased is less important.  
10  
11  
12  
13  
14  
15  
16  
17  
18  
19  
20  
21  
22  
23  
24  
25

26 Whilst for 10 out of the 19 years, Chi-squared analysis indicated significance in kidney  
27 donation rates (Table 2) further application of post hoc test showed far fewer statistically  
28 significant differences. These occurred between Wales and Scotland (in 2003-2004, 2005-  
29 2006 and 2006-2007) between Scotland and Northern Ireland (in 1996-1997, 2002-2003,  
30 2003-2004 and 2006-2007) between England and Wales (in 1994-1995 and 2003-2004) and  
31 between England and Northern Ireland (in 1991-1992 and 1996-1997). Similarly for liver  
32 donation rates, Chi-squared analysis showed statistical differences across the regions for 7  
33 out of the 19 years but following post hoc tests, statistical significance was only evident  
34 between Wales and Scotland for 3 out of the 19 years (1996-1997, 2003-2004 and 2006-  
35 2007) between England and Wales (in 1996-1997 and 2003-2004) and between Scotland and  
36 Northern Ireland in 2006-2007 (Table 2). There were no significant differences for any year  
37 between Wales and Northern Ireland for kidney and liver donations.  
38  
39  
40  
41  
42  
43  
44  
45  
46  
47  
48  
49  
50  
51  
52  
53  
54  
55  
56  
57

58 In the case of lung and heart donations, there were no significant post hoc differences  
59 between any of the regions over the two decades (Table 2). Lung and heart donations have  
60

1  
2  
3  
4  
5  
6  
7  
8  
9  
10  
11  
12  
13  
14  
15  
16  
17  
18  
19  
20  
21  
22  
23  
24  
25  
26  
27  
28  
29  
30  
31  
32  
33  
34  
35  
36  
37  
38  
39  
40  
41  
42  
43  
44  
45  
46  
47  
48  
49  
50  
51  
52  
53  
54  
55  
56  
57  
58  
59  
60

been very low in number in all regions across all the years and this may reflect the fact that heart beating donors, on which heart and most lung transplants depend have been decreasing for around a decade across the UK.[10]

For peer review only



| Year  | Kidney       |     |              |             |     |              | Heart        |     |     |             |     |              |
|-------|--------------|-----|--------------|-------------|-----|--------------|--------------|-----|-----|-------------|-----|--------------|
|       | qEW          | qES | qEN          | qWS         | qWN | qSN          | qEW          | qES | qEN | qWS         | qWN | qSN          |
| 90-91 | N/A          | N/A | N/A          | N/A         | N/A | N/A          | N/A          | N/A | N/A | N/A         | N/A | N/A          |
| 91-92 | X            | X   | <b>-4.70</b> | X           | X   | X            | N/A          | N/A | N/A | N/A         | N/A | N/A          |
| 92-93 | N/A          | N/A | N/A          | N/A         | N/A | N/A          | N/A          | N/A | N/A | N/A         | N/A | N/A          |
| 93-94 | N/A          | N/A | N/A          | N/A         | N/A | N/A          | N/A          | N/A | N/A | N/A         | N/A | N/A          |
| 94-95 | <b>-5.84</b> | X   | X            | X           | X   | X            | N/A          | N/A | N/A | N/A         | N/A | N/A          |
| 95-96 | N/A          | N/A | N/A          | N/A         | N/A | N/A          | N/A          | N/A | N/A | N/A         | N/A | N/A          |
| 96-97 | X            | X   | <b>-4.65</b> | X           | X   | <b>5.13</b>  | N/A          | N/A | N/A | N/A         | N/A | N/A          |
| 97-98 | X            | X   | X            | X           | X   | X            | N/A          | N/A | N/A | N/A         | N/A | N/A          |
| 98-99 | N/A          | N/A | N/A          | N/A         | N/A | N/A          | N/A          | N/A | N/A | N/A         | N/A | N/A          |
| 99-00 | N/A          | N/A | N/A          | N/A         | N/A | N/A          | N/A          | N/A | N/A | N/A         | N/A | N/A          |
| 00-01 | N/A          | N/A | N/A          | N/A         | N/A | N/A          | N/A          | N/A | N/A | N/A         | N/A | N/A          |
| 01-02 | X            | X   | X            | X           | X   | X            | N/A          | N/A | N/A | N/A         | N/A | N/A          |
| 02-03 | X            | X   | X            | X           | X   | <b>-4.77</b> | N/A          | N/A | N/A | N/A         | N/A | N/A          |
| 03-04 | <b>-4.51</b> | X   | X            | <b>5.53</b> | X   | <b>-4.43</b> | N/A          | N/A | N/A | N/A         | N/A | N/A          |
| 04-05 | X            | X   | X            | X           | X   | X            | X            | X   | X   | X           | X   | X            |
| 05-06 | X            | X   | X            | <b>5.28</b> | X   | X            | N/A          | N/A | N/A | N/A         | N/A | N/A          |
| 06-07 | X            | X   | X            | <b>4.79</b> | X   | <b>-4.83</b> | X            | X   | X   | X           | X   | X            |
| 07-08 | N/A          | N/A | N/A          | N/A         | N/A | N/A          | N/A          | N/A | N/A | N/A         | N/A | N/A          |
| 08-09 | N/A          | N/A | N/A          | N/A         | N/A | N/A          | N/A          | N/A | N/A | N/A         | N/A | N/A          |
|       | <b>Lung</b>  |     |              |             |     |              | <b>Liver</b> |     |     |             |     |              |
|       | qEW          | qES | qEN          | qWS         | qWN | qSN          | qEW          | qES | qEN | qWS         | qWN | qSN          |
| 90-91 | N/A          | N/A | N/A          | N/A         | N/A | N/A          | N/A          | N/A | N/A | N/A         | N/A | N/A          |
| 91-92 | N/A          | N/A | N/A          | N/A         | N/A | N/A          | X            | X   | X   | X           | X   | X            |
| 92-93 | N/A          | N/A | N/A          | N/A         | N/A | N/A          | X            | X   | X   | X           | X   | X            |
| 93-94 | N/A          | N/A | N/A          | N/A         | N/A | N/A          | N/A          | N/A | N/A | N/A         | N/A | N/A          |
| 94-95 | N/A          | N/A | N/A          | N/A         | N/A | N/A          | N/A          | N/A | N/A | N/A         | N/A | N/A          |
| 95-96 | N/A          | N/A | N/A          | N/A         | N/A | N/A          | N/A          | N/A | N/A | N/A         | N/A | N/A          |
| 96-97 | N/A          | N/A | N/A          | N/A         | N/A | N/A          | <b>-5.10</b> | X   | X   | <b>5.84</b> | X   | X            |
| 97-98 | N/A          | N/A | N/A          | N/A         | N/A | N/A          | X            | X   | X   | X           | X   | X            |
| 98-99 | N/A          | N/A | N/A          | N/A         | N/A | N/A          | N/A          | N/A | N/A | N/A         | N/A | N/A          |
| 99-00 | X            | X   | X            | X           | X   | X            | N/A          | N/A | N/A | N/A         | N/A | N/A          |
| 00-01 | N/A          | N/A | N/A          | N/A         | N/A | N/A          | N/A          | N/A | N/A | N/A         | N/A | N/A          |
| 01-02 | N/A          | N/A | N/A          | N/A         | N/A | N/A          | N/A          | N/A | N/A | N/A         | N/A | N/A          |
| 02-03 | N/A          | N/A | N/A          | N/A         | N/A | N/A          | N/A          | N/A | N/A | N/A         | N/A | N/A          |
| 03-04 | N/A          | N/A | N/A          | N/A         | N/A | N/A          | <b>-4.63</b> | X   | X   | <b>5.24</b> | X   | X            |
| 04-05 | N/A          | N/A | N/A          | N/A         | N/A | N/A          | X            | X   | X   | X           | X   | X            |
| 05-06 | N/A          | N/A | N/A          | N/A         | N/A | N/A          | N/A          | N/A | N/A | N/A         | N/A | N/A          |
| 06-07 | N/A          | N/A | N/A          | N/A         | N/A | N/A          | X            | X   | X   | <b>5.70</b> | X   | <b>-5.81</b> |
| 07-08 | N/A          | N/A | N/A          | N/A         | N/A | N/A          | N/A          | N/A | N/A | N/A         | N/A | N/A          |
| 08-09 | N/A          | N/A | N/A          | N/A         | N/A | N/A          | N/A          | N/A | N/A | N/A         | N/A | N/A          |

|       | Cornea |       |       |       |       |      | BMJ Open |
|-------|--------|-------|-------|-------|-------|------|----------|
|       | qEW    | qES   | qEN   | qWS   | qWN   | qSN  |          |
| 90-91 | 4.77   | 11.45 | 7.22  | X     | X     | X    |          |
| 91-92 | X      | 11.68 | 5.76  | 6.72  | X     | X    |          |
| 92-93 | X      | 6.47  | 5.90  | X     | X     | X    |          |
| 93-94 | 5.0    | 9.31  | 8.78  | X     | X     | X    |          |
| 94-95 | X      | 9.04  | 7.58  | X     | X     | X    |          |
| 95-96 | -13.93 | 8.66  | 7.57  | 16.90 | 15.05 | X    |          |
| 96-97 | -13.40 | 9.71  | 7.71  | 17.06 | 14.80 | X    |          |
| 97-98 | -7.66  | 7.70  | 9.39  | 11.00 | 12.34 | X    |          |
| 98-99 | -7.37  | 8.92  | 9.26  | 11.47 | 12.05 | X    |          |
| 99-00 | -8.42  | 7.58  | 10.57 | 11.58 | 13.76 | 5.40 |          |
| 00-01 | X      | 8.90  | 9.50  | 5.78  | 7.81  | X    |          |
| 01-02 | -6.29  | 10.79 | 7.76  | 11.63 | 10.18 | X    |          |
| 02-03 | -8.91  | 8.83  | 7.93  | 12.72 | 12.05 | X    |          |
| 03-04 | -10.58 | 14.19 | 8.34  | 17.25 | 13.50 | X    |          |
| 04-05 | -8.20  | 7.95  | 11.22 | 11.60 | 14.11 | 5.70 |          |
| 05-06 | X      | 12.13 | 9.21  | 5.64  | 5.96  | X    |          |
| 06-07 | X      | 11.01 | 9.81  | 7.46  | 8.40  | X    |          |
| 07-08 | X      | 9.33  | 13.22 | X     | 8.50  | 6.71 |          |
| 08-09 | X      | 7.68  | 13.76 | X     | 7.92  | 8.05 |          |

**Key**

qEW is the Studentised range statistic for the difference between the proportions in England and Wales (a negative score indicates that the proportion was greater in Wales)

qES = England with Scotland

qEN = England with N. Ireland

qWS = Wales with Scotland

qWN = Wales with N. Ireland

qSN = Scotland with N. Ireland

Cells marked N/A indicate the Chi-square test was not significant ( $p > 0.01$ ) and hence no post hoc comparison tests were carried out. Values in bold indicate that the difference between two independent proportions is significant at 0.01 level (two-tailed test) using the Tukey HSD test whilst an X indicates it was not ( $p > 0.01$ ). A row of six cells marked X for any combination of organ and year indicates that the Chi-square test was significant ( $p < 0.01$ ) but the post hoc comparison test for a particular pair of countries was not ( $p > 0.01$ ).

Table 2: Statistical analyses using Chi-square and Tukey's HSD test comparing differences in organ donation between each of the four regions: England, Scotland, Wales and Northern Ireland for five organs

*Can parallels be drawn from the EU?*

1  
2  
3  
4 It has been suggested that at least 20-30 deceased donors per million population would be  
5  
6 necessary to meet the UK's increasing demands.[11] The British Medical Association called  
7  
8 for changes in legislation, suggesting a system of presumed consent that allows for objections  
9  
10 of relatives.[12] The Organ Donation Taskforce was commissioned in 2008 to consider the  
11  
12 potential effects of such legislation and concluded that a change to presumed consent at this  
13  
14 time was unlikely to increase organ donation rates, may incur prohibitive costs and could  
15  
16 result in a backlash; other factors needed to be considered before introducing legislative  
17  
18 change.[13]  
19  
20  
21  
22  
23

24  
25 Bird and Harris modelled situations with varying relative refusal rates and drew on  
26  
27 comparisons with EU countries that already adopted presumed consent systems.[14]  
28  
29 However, presumed consent for organ donation has been implemented with varying effect in  
30  
31 the EU. Adoption and successful implementation of laws in one country should not be taken  
32  
33 as a guarantee of similar success in another. Hence, though Sweden applies presumed  
34  
35 consent, its donation rate in 2009, at 13.8 deceased donors per million population,[6] was  
36  
37 comparable to that of Germany (14.5 deceased donors per million population) and Denmark  
38  
39 (14.0 deceased donors per million population);[5] both of which require informed consent  
40  
41 (Figure 2). The figures available for Ireland, where informed consent is needed, were 21.2  
42  
43 deceased donors per million population in 2009.[4] The nation with the highest donor rate  
44  
45 (34.4 deceased donors per million population in 2009)[15], and one often cited as evidence of  
46  
47 successful implementation of presumed consent legislation[16], is Spain which operates a  
48  
49 "soft" form of presumed consent where next of kin can object to organ donation[15-16]. Yet,  
50  
51 the impact of the legislation has been questioned and the high rate of donor activity attributed  
52  
53 to the "Spanish Model"[15-16] that demands an integrated approach with dedicated  
54  
55 transplant co-ordinators, mainly intensive care physicians, involved in procurement[16]. This  
56  
57  
58  
59  
60

1 highly coordinated network and the respect for autonomy given to the individual and their  
2 relatives, is credited with improving donation rates of 14.3 deceased donors per million  
3 population in 1989 to rates of 33-35 deceased donors per million population in recent  
4 years.[15-16] The majority of donations in Spain are from heart-beating donors in intensive  
5 care; live organ donation and that from non-heart beating donors is relatively low[16]. The  
6 converse is true in the UK and estimates suggest that even if a theoretical upper limit were  
7 reached, with present facilities and practices, heart beating donor numbers in the UK would  
8 only reach half of those in Spain.[16] Given that Spain introduced presumed consent in  
9 1979[3], it is clear that a legislative change alone was not sufficient to improve donation  
10 rates. It is notable that Spain achieves a significantly higher rate of donation than does  
11 Austria [5] which relies upon a “hard” approach in which views of relatives are not routinely  
12 sought.

13  
14  
15  
16  
17  
18  
19  
20  
21  
22  
23  
24  
25  
26  
27  
28  
29  
30  
31 Comparisons across the EU further indicate that whilst a country may have relatively low  
32 overall donation rates, for certain organs the trend may be reversed. Sweden lags behind  
33 countries like Austria, Belgium, Germany and the Netherlands with regard to overall  
34 deceased donations but has had the highest kidney donation rate for the majority of the past  
35 13 years.[5-6]

## 36 37 38 39 40 41 42 43 44 45 46 **Conclusions**

47  
48  
49 Data from the four UK regions show that organ donation rates vary over the last two decades  
50 but that few significant differences exist in organ donation rates for most organs investigated  
51 with the cornea a notable exception. From these findings, the introduction of presumed  
52 consent legislation across the UK should not result in discrepancies arising from regional  
53 variations. However, shortfalls in Scotland and Northern Ireland in corneal donation rates  
54 need to be addressed. Further exploration of underlying regional differences, organisational  
55  
56  
57  
58  
59  
60

1 issues and practices and attitudes that may affect corneal donation needs to be undertaken.  
2  
3 Comparison of EU nations, and particularly Spain, indicates that improvement of donation  
4 rates is unlikely to be achieved by introducing new legislation alone.  
5  
6  
7  
8

9  
10 **Provenance/Contributorship:** Barbara Pierscionek is a Professor of Vision Science at the  
11 School of Biomedical Science, University of Ulster. She is qualified in science and law,  
12 teaches ethics and law and researches the biology and physics of ageing as well as healthcare  
13 ethics and presumed consent. Gordon Rae is a Professor of Psychology at the School of  
14 Psychology, University of Ulster, trained in mathematics and statistics as well as psychology  
15 and his research interests include applying statistical methods to psychology and medicine.  
16  
17 Carol McClenahan is a lecturer in Psychology at the School of Psychology, University of  
18 Ulster. Her research expertise is in attitude and behavioural change in relation to health. She  
19 also has an interest in ethics in psychology and health. Donal McGlade is currently  
20 undertaking a PhD on attitudes that determine behaviour with respect to organ donation. All  
21 authors were involved in preparation of the manuscript. Barbara Pierscionek is the guarantor.  
22  
23  
24  
25  
26  
27  
28  
29  
30  
31  
32  
33  
34  
35  
36  
37  
38  
39

40 “All authors have completed the Unified Competing Interest form at  
41 [www.icmje.org/coi\\_disclosure.pdf](http://www.icmje.org/coi_disclosure.pdf) (available on request from the corresponding author)  
42 (URL) and declare that all authors had: (1) No financial support for the submitted work from  
43 anyone other than their employer; (2) No financial relationships with commercial entities  
44 that might have an interest in the submitted work; (3) No spouses, partners, or children with  
45 relationships with commercial entities that might have an interest in the submitted work; (4)  
46 No Non-financial interests that may be relevant to the submitted work.”  
47  
48  
49  
50  
51  
52  
53  
54  
55  
56  
57  
58

59 “This research received no specific grant from any funding agency in the public, commercial  
60 or not-for-profit sectors.”

1  
2  
3 “The Corresponding Author has the right to grant on behalf of all authors and does grant on  
4 behalf of all authors, an exclusive licence (or non-exclusive for government employees) on a  
5 worldwide basis to the BMJ Group and co-owners or contracting owning societies (where  
6 published by the BMJ Group on their behalf), and its Licensees to permit this article (if  
7 accepted) to be published in BMJ Open and any other BMJ Group products and to exploit all  
8 subsidiary rights, as set out in our licence.”  
9  
10  
11  
12  
13  
14  
15  
16  
17  
18  
19  
20  
21

## 22 References

- 23  
24  
25 1. Murphy P, Smith M. A historic opportunity to improve organ donation in the UK. *Br J*  
26 *Anaesth* 2008;100:735-737.  
27  
28
- 29  
30 2. NHSBT. Personal communication with principal statistician at NHSBT, 16<sup>th</sup> November  
31  
32 2010.  
33  
34
- 35 3. Gabel H. Organ donor registers. *Curr Opin Organ Transplant* 2006;11:187-193.  
36  
37
- 38 4. Organ Procurement Service. Annual Report 2008-2009. Dublin: Organ Procurement  
39  
40 Service; 2008-2009.  
41
- 42 5. Cohen B, Persijn G. Annual Report 1997-2009. Eurotransplant International Foundation;  
43  
44 1997-2009.  
45  
46
- 47 6. Scandiatransplant. Personal communication with assistant to the medical director at  
48  
49 Scandiatransplant, 27th January 2011.  
50
- 51 7. Zar JH. Biostatistical Analysis 4<sup>th</sup> Edition. Upper Saddle River, N.J.: Prentice Hall  
52  
53 1999:562-564.  
54  
55
- 56 8. Kent B, Owens RG. Conflicting attitudes to corneal and organ donation: a study of nurses  
57  
58 attitudes to organ donation. *Int J Nurs Stud* 1995;32:484-492.  
59  
60

- 1  
2  
3  
4  
5  
6  
7  
8  
9  
10  
11  
12  
13  
14  
15  
16  
17  
18  
19  
20  
21  
22  
23  
24  
25  
26  
27  
28  
29  
30  
31  
32  
33  
34  
35  
36  
37  
38  
39  
40  
41  
42  
43  
44  
45  
46  
47  
48  
49  
50  
51  
52  
53  
54  
55  
56  
57  
58  
59  
60  
9. The Cremation Society of Great Britain. Table of cremations carried out in the United Kingdom [Internet]. 2008 [updated 2010 Oct 27; cited 2010 Oct 27]. Available from: <http://www.srgw.demon.co.uk/cremsoc/>
10. NHS Blood & Transplant. Transplant activity in the UK: Activity report 2009/10. Bristol: NHS Blood & Transplant; 2010.
11. Cameron S, Forsythe J. How can we improve organ donation rates? Research into the identification of factors which may influence the variation. *Nefrologia* 2001;21:68-77.
12. British Medical Association Medical Ethics Committee. Organ donation in the 21<sup>st</sup> century: Time for a consolidated approach. London: British Medical Association; 2000.
13. Organ Donation Taskforce. The potential impact of an opt out system for organ donation in the UK: an independent report from the Organ Donation Taskforce. UK Department of Health; 2008.
14. Bird SM, Harris J. Time to move to presumed consent for organ donation. *BMJ* 2010;340:c2188.
15. Matesanz R, Marazuela R, Domínguez-Gil B, et al. The 40 donors per million population plan: an action plan for improvement of organ donation and transplantation in Spain. *Transplant Proc* 2009;41:3453-3456.
16. Fabre J, Murphy P, Matesanz R. Presumed consent: a distraction in the quest for increasing rates of organ donation. *BMJ* 2010;341:c4973

**Figure captions**

Figure 1: a) Organ donor registration rates in England, Wales, Scotland and Northern Ireland 1994-2009.[2] b) Organ donation rates in England, Wales, Scotland and Northern Ireland 1990-2009.[2]

Figure 2: Organ donor rates in selected EU countries 1997-2009.[13-14]

For peer review only



## ■ Research review guidelines : modified from RATS guidelines

| ASK THIS OF THE MANUSCRIPT                                                                                                                                                                                                      | THIS SHOULD BE INCLUDED IN THE MANUSCRIPT                                                                                                                                                  | ✓<br><>    |
|---------------------------------------------------------------------------------------------------------------------------------------------------------------------------------------------------------------------------------|--------------------------------------------------------------------------------------------------------------------------------------------------------------------------------------------|------------|
| <b>R Relevance of study question</b><br><br>Is the research question interesting?<br><br>Is the research question relevant to clinical practice, public health, or policy? <i>It is relevant to policy</i>                      | Research question explicitly stated<br><br>Research question justified and linked to the existing knowledge base (empirical research, theory, policy)                                      | ✓<br><br>✓ |
| <b>A Appropriateness of the method</b><br><br>Is the methodology used the best approach for the study aims?                                                                                                                     | Study design described and justified : <i>data for all organ donations and registrations was required in order to compare trends across the four UK regions.</i>                           | ✓          |
| <b>T Transparency of procedures</b><br><br><i>Data collection</i><br><br>Was collection of data systematic and comprehensive?<br><br>Why and when was data collection stopped, and is this reasonable?                          | Method (s) outlined : <i>all available data from centralized sources collected</i><br><br>End of data collection justified and described: <i>all available complete data was collected</i> | ✓<br><br>✓ |
| <b>S Soundness of interpretive approach</b><br><br><i>Analysis</i><br><br>Is the type of analysis appropriate for the type of study?<br><br>Are the interpretations clearly presented and adequately supported by the evidence? | Analytic approach described in depth and justified<br><br>Statistical analysis conducted using appropriate test<br><br>Analysis, presentation and interpretation provided                  | ✓<br><br>✓ |
| <i>Discussion and presentation</i>                                                                                                                                                                                              |                                                                                                                                                                                            |            |

1  
2  
3  
4 Is adequate account taken of previous  
5 knowledge and how the findings add?  
6

Findings presented with reference to existing literature, and  
how they contribute

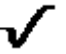

7 Is the manuscript well written and accessible?  
8  
9

Evidence of following guidelines (format, word count)  
Written for a health sciences audience

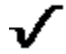

10  
11  
12  
13  
14  
15  
16  
17  
18  
19  
20  
21  
22  
23  
24  
25  
26  
27  
28  
29  
30  
31  
32  
33  
34  
35  
36  
37  
38  
39  
40  
41  
42  
43  
44  
45  
46  
47  
48  
49  
50  
51  
52  
53  
54  
55  
56  
57  
58  
59  
60

For peer review only

1  
2  
3  
4  
5  
6  
7  
8  
9  
10  
11  
12  
13  
14  
15  
16  
17  
18  
19  
20  
21  
22  
23  
24  
25  
26  
27  
28  
29  
30  
31  
32  
33  
34  
35  
36  
37  
38  
39  
40  
41  
42  
43  
44  
45  
46  
47  
48  
49  
50  
51  
52  
53  
54  
55  
56  
57  
58  
59  
60

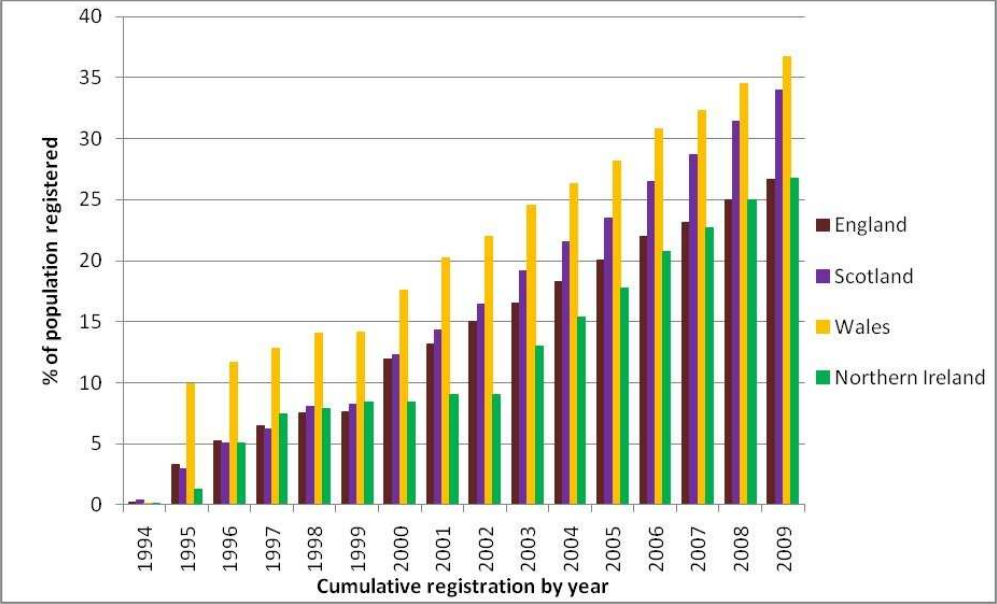

39x23mm (600 x 600 DPI)

Review only

1  
2  
3  
4  
5  
6  
7  
8  
9  
10  
11  
12  
13  
14  
15  
16  
17  
18  
19  
20  
21  
22  
23  
24  
25  
26  
27  
28  
29  
30  
31  
32  
33  
34  
35  
36  
37  
38  
39  
40  
41  
42  
43  
44  
45  
46  
47  
48  
49  
50  
51  
52  
53  
54  
55  
56  
57  
58  
59  
60

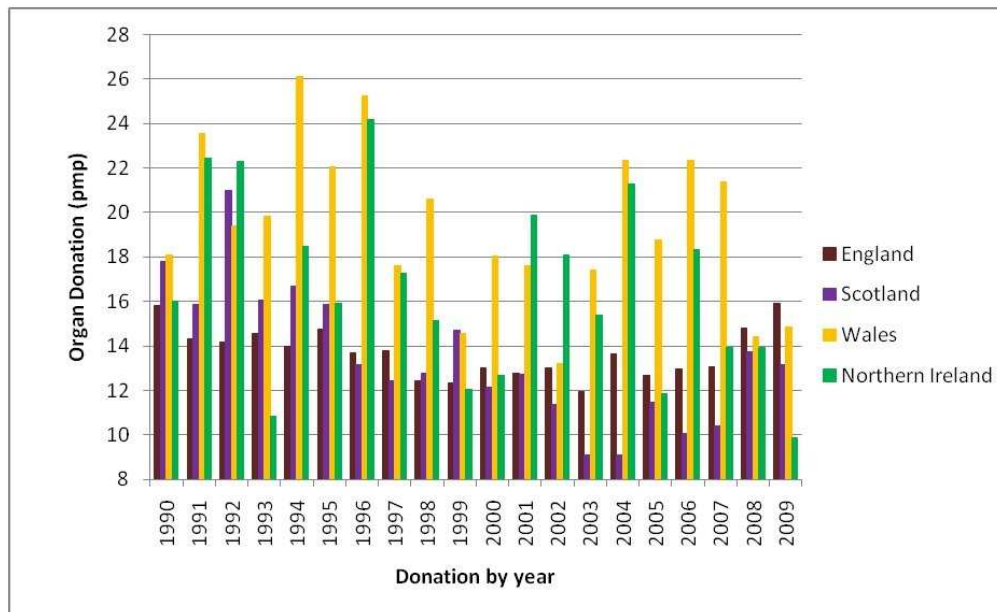

39x24mm (600 x 600 DPI)

Review only

1  
2  
3  
4  
5  
6  
7  
8  
9  
10  
11  
12  
13  
14  
15  
16  
17  
18  
19  
20  
21  
22  
23  
24  
25  
26  
27  
28  
29  
30  
31  
32  
33  
34  
35  
36  
37  
38  
39  
40  
41  
42  
43  
44  
45  
46  
47  
48  
49  
50  
51  
52  
53  
54  
55  
56  
57  
58  
59  
60

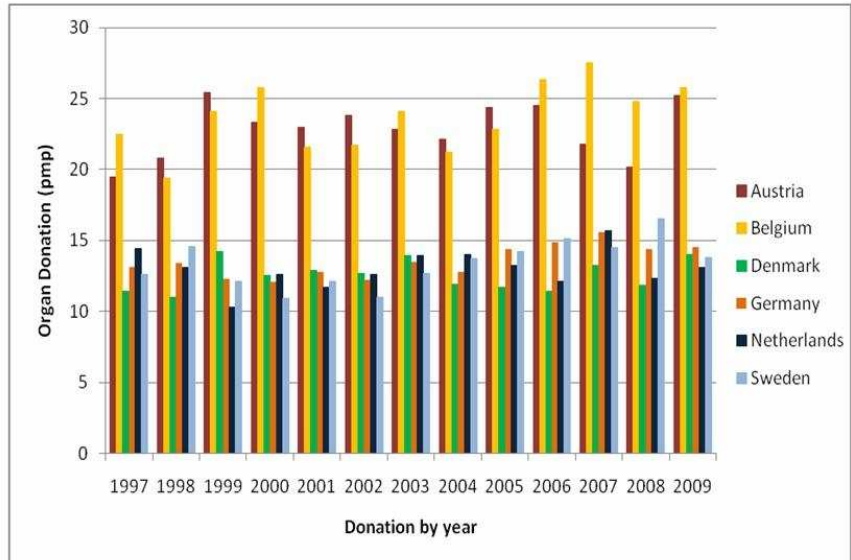

Figure 2

254x190mm (96 x 96 DPI)

ew only

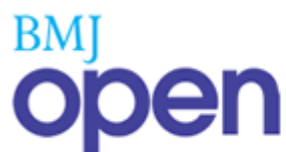

## Regional and temporal variations in organ donation across the UK

|                                 |                                                                                                                                                                                                                                      |
|---------------------------------|--------------------------------------------------------------------------------------------------------------------------------------------------------------------------------------------------------------------------------------|
| Journal:                        | <i>BMJ Open</i>                                                                                                                                                                                                                      |
| Manuscript ID:                  | BMJ Open.2010.000055.R2                                                                                                                                                                                                              |
| Article Type:                   | Research                                                                                                                                                                                                                             |
| Date Submitted by the Author:   | 13-Jul-2011                                                                                                                                                                                                                          |
| Complete List of Authors:       | McGlade, Donal; University of Ulster, Biomedical Sciences<br>Rae, Gordon; University of Ulster, Psychology<br>McClenahan, Carol; University of Ulster, Psychology<br>Pierscionek, Barbara; University of Ulster, Biomedical Sciences |
| <b>Primary Subject Heading</b>: | Health policy                                                                                                                                                                                                                        |
| Keywords:                       | Health policy < HEALTH SERVICES ADMINISTRATION & MANAGEMENT, Transplant medicine < INTERNAL MEDICINE, LAW (see Medical Law), organ donation, presumed consent, UK regional variations                                                |
|                                 |                                                                                                                                                                                                                                      |

SCHOLARONE™  
Manuscripts

only

## Regional and temporal variations in organ donation across the UK

*(secondary analysis of databases)*

Donal McGlade[1], Gordon Rae[2], Carol McClenahan[2], Barbara Pierscionek[1,\*]

1. School of Biomedical Science, University of Ulster, Cromore Road  
Coleraine, BT52 1SA
2. School of Psychology, University of Ulster, Cromore Road, Coleraine,  
BT52 1SA

\*Corresponding author email [b.pierscionek@ulster.ac.uk](mailto:b.pierscionek@ulster.ac.uk) telephone: 02870123293

**Key words:** *organ donation, presumed consent, UK regional variations, EU organ donation*

Word count: 2478 words

1  
2  
3  
4 **Objectives:** To explore regional variations in donation of cadaveric solid organs and tissues  
5  
6 across the four devolved health administrations of the UK (England, Scotland, Wales &  
7  
8 Northern Ireland).  
9

10  
11 **Design:** A secondary analysis of databases from NHS Blood & Transplant (1990-2009) and  
12  
13 from the National Organ Procurement Service for the Republic of Ireland, Eurotransplant  
14  
15 International Foundation and Scandiatransplant.  
16  
17

18  
19 **Results:** After adjusting for time, statistically significant differences were found among the  
20  
21 four regions ( $p < 0.001$ ) for liver donations. The only exceptions were between England and  
22  
23 Scotland and between Wales and Northern Ireland where the differences were not significant  
24  
25 following a Bonferroni correction ( $p > 0.008$ ). England had significantly fewer heart donations  
26  
27 than both Wales ( $p < 0.001$ ) and Northern Ireland ( $p = 0.005$ ). There were no significant  
28  
29 differences among the four regions for lung donations. Regional variations in kidney and  
30  
31 corneal donations were moderated by time. Northern Ireland, however, has had consistently  
32  
33 lower corneal donation rates than the other three regions.  
34  
35  
36  
37

38  
39 **Conclusion:** Organ donation rates over the last two decades vary in the four UK regions and  
40  
41 this variation depends on the type of organ donated. Further exploration of underlying  
42  
43 factors, organisational issues, practices and attitudes to organ donation in the four regions of  
44  
45 the UK, taking into account findings from EU countries with varying approaches to presumed  
46  
47 consent, needs to be undertaken before such legislation is introduced across the UK.  
48  
49  
50  
51  
52  
53  
54  
55  
56  
57  
58  
59  
60



**Article focus:**

- To investigate organ donation of cadaveric solid organs and tissues across the four devolved health administrations of the UK and how they vary with time;
- To consider reasons for regional variations and those related to organ type, drawing on regional differences in culture and practice and on findings in other EU countries.

**Key messages:**

- organ donation and registration rates vary with time across the four regions of UK;
- heart and liver donations are highest in Wales and Northern Ireland;
- the significance of regional variations on kidney and corneal donation rates is moderated by the effect of changes over time; Northern Ireland consistently has the lowest corneal donation rate;
- the reasons for regional variations require further investigation as well as comparisons with practices and attitudes in other EU states

**Strengths & limitations:**

The strengths of this article are a) its novelty, as this is the first article that has analysed data across the UK and shown patterns in donation rates in the four regions over the last two decades; b) its timeliness given the shortfall in organ donations and the continuing debate about altering legislation to permit presumed consent and its importance in investigating for which organs regional differences exist and for which organs donation rates are similar. The limitation of this work was that data from other EU countries, for the entire time period investigated, were not available.

## Introduction

Approximately 80-90% of the UK population support the principle of organ donation[1], yet, only 28% of the population carry an organ donor card.[2] Despite advances in transplantation medicine, organ shortage is the single most limiting factor preventing potential recipients from receiving the benefits of transplantation.[3] If the overwhelming support for organ donation could be directly translated into a willingness to donate, this should bode well for a presumed consent system (allowing organs to be used for transplantation unless the individual has explicitly objected). However, interpretation of these findings is far from simple. The authors argue that before considering a presumed consent system, differences in donation and registration rates for different organs in the four regions of the UK need to be investigated and reasons for any differences explored. Without such research, a nationally imposed system for all organs may fail or create regional inequalities. This paper presents an analysis of data of organ donation and registration in the four regions of the UK for five organ types: kidney, liver, heart, lung and cornea in order to determine whether significant differences exist across the four regions and whether these vary depending on the organ. Comparisons are made to European nations that have adopted presumed consent as well as to those that have not.

## Methods

Information about all organ donations and registration in the four regions of the UK: England, Scotland, Wales and Northern Ireland was obtained from NHS Blood & Transplant for all available years: from 1990-2009.[2] Data from other European nations was provided from the National Organ Procurement Service for the Republic of Ireland [4], Eurotransplant International Foundation [5] and Scandiatransplant [6]. Statistical analyses were carried out

1 using Poisson regression (SPSS version 17). Bonferroni corrections were used to control for  
2  
3 Type I errors when making inter-regional comparisons.  
4  
5  
6  
7

## 8 9 **Results and Discussion**

### 10 11 *Regional variations in registration and donation*

12  
13  
14  
15 The UK currently operates a system of informed consent requiring individuals who wish to  
16 donate, to formally register their intention on a centralised register and to carry an organ  
17 donor card. Figure 1a shows that since the organ donor register was first launched in 1994,  
18 Wales has consistently outperformed other parts of the UK in terms of the percentage of  
19 population registered, with Scotland in second position, England third and Northern Ireland  
20 last. (A caveat is that although records are updated periodically to remove those who have  
21 died subsequent to being registered, organ donor registration rates may still include some  
22 entries of deceased individuals. This should not, however, affect regional variations).  
23  
24  
25  
26  
27  
28  
29  
30  
31  
32  
33  
34  
35  
36  
37  
38

39 When the registration rates are compared to donation rates, the trends are somewhat  
40 different.[2] The rate of organ donation is consistently higher in Wales than the UK average  
41 for the majority of the last 20 years (Figure 1b). Donation rates in Northern Ireland are the  
42 second highest, achieving a higher than UK average in 13 of those years, with Scotland  
43 achieving this in 6 years and England capable of achieving this in only 3 years. So whilst  
44 registration and donation are both highest in Wales, amongst the other parts of the UK  
45 registration and donation do not follow similar trends. In Northern Ireland, for example,  
46 where willingness to register as an organ donor is lower than any other UK region, the organ  
47 donation rate is generally higher than in England or Scotland. It is also notable that whilst  
48 England exhibits the least variation in organ donation over the last two decades, Scotland  
49  
50  
51  
52  
53  
54  
55  
56  
57  
58  
59  
60

1 shows an overall decrease in donation with trends in Wales and Northern Ireland varying  
2  
3 from year to year with the greatest fluctuations in the latter.[2]  
4  
5  
6  
7

### 8 9 *Variations in donation according to organ type*

10  
11 Masked by general variations in donation are the figures for individual organs. Table 1 shows  
12 the rate of donation for each region of the UK for different organs.[2] Poisson regression  
13 analyses were carried out on the numbers of organ donations (entries in Table 1 x the  
14 population for each country in that year expressed in millions) using the Generalized Linear  
15 Models program in SPSS Version 17. The offset was the natural logarithm of the total  
16 population for each country, which varied slightly from year to year. Separate analyses were  
17 carried out for each organ because it was deemed highly probable that donors often give more  
18 than one organ and hence a single model analysis would violate the assumption of  
19 independent observations. Four different models were considered: the intercept only model,  
20 M0, which included no explanatory variables; model M1, which included the explanatory  
21 variable year (as well as the intercept); model M2 which included the explanatory variables  
22 year and country; and the full or saturated model M3 which includes the explanatory  
23 variables year and country and their interaction. Pairs of models were compared using the  
24 differences between their deviance values ( $\Delta D$ ). This statistic is a large-sample chi-squared  
25 statistic with degrees of freedom equal to the difference between the residual df values for the  
26 two models. Table 2 shows that for all organs, model M1 was a statistically significant  
27 improvement over model M0 and model M2 was a significant improvement over model M1  
28 (in all cases the value of  $\Delta D$  was significant at  $p < 0.001$ ). In the case of liver, lung and heart,  
29 model M2 was not statistically significantly different from the saturated model M3. Since the  
30 two models have comparable fit, the former was selected on the grounds that it is the more  
31 parsimonious (requires fewer parameters to be estimated). Applying model M2 for the liver,  
32 Wales had significantly higher counts than England and Scotland (Wald chi-square 90.23, df  
33  
34  
35  
36  
37  
38  
39  
40  
41  
42  
43  
44  
45  
46  
47  
48  
49  
50  
51  
52  
53  
54  
55  
56  
57  
58  
59  
60

1 = 1,  $p < 0.001$ ; 65.12,  $df = 1$ ,  $p < 0.001$  respectively) and Northern Ireland had significantly  
2 higher counts than England and Scotland (Wald chi-square 21.34,  $df = 1$ ,  $p < 0.001$ ; 19.04,  $df$   
3 = 1,  $p < 0.001$ , respectively). After a Bonferroni correction (six comparisons carried out,  
4 original alpha = 0.05, adjusted significance level =  $0.05/6 = 0.008$ ) there was no statistically  
5 significant difference between England and Scotland nor between Wales and Northern  
6 Ireland (Wald chi-square 0.506,  $df = 1$ ,  $p = 0.477$ ; 5.76,  $df = 1$ ,  $p = 0.016$ ). For the lung there  
7 were no statistically significant differences between the regions. In the case of the heart,  
8 England had significantly fewer donations than Wales and Northern Ireland (Wald chi-square  
9 19.86,  $df = 1$ ,  $p < 0.001$ ; 8.06,  $df = 1$ ,  $p = 0.005$ , respectively). There were no significant  
10 differences between Scotland and the other three regions after applying a Bonferroni  
11 correction.  
12  
13  
14  
15  
16  
17  
18  
19  
20  
21  
22  
23  
24  
25  
26  
27  
28  
29

30 For the cornea and kidney, model M2 was a significantly poorer fit than the saturated model.  
31 (There was also substantial overdispersion as indicated by the values of  $D/df$  shown in Table  
32 2 which was not corrected using a negative binomial as an alternative model). These findings  
33 suggest that for these organs the effect of country was moderated by year. For example, in the  
34 case of the cornea the donor rates per million for Scotland and Northern Ireland were quite  
35 close in 1991-92 (12.3 and 14.0 respectively) whereas in 2008-9 there was a substantial  
36 discrepancy (21.1 and 4.1 respectively). Inspection of the Poisson interaction term indicated  
37 that the difference between Scotland and Northern Ireland in 2008-9 (17.0) was significantly  
38 greater ( $p < 0.001$ ) than the difference between the two regions in 1991-92.  
39  
40  
41  
42  
43  
44  
45  
46  
47  
48  
49  
50  
51  
52  
53  
54  
55  
56  
57  
58  
59  
60

1  
2  
3  
4  
5  
6  
7  
8  
9  
10  
11  
12  
13  
14  
15  
16  
17  
18  
19  
20  
21  
22  
23  
24  
25  
26  
27  
28  
29  
30  
31  
32  
33  
34  
35  
36  
37  
38  
39  
40  
41  
42  
43  
44  
45  
46  
47  
48  
49  
50  
51  
52  
53  
54  
55  
56  
57  
58  
59  
60

|       | Kidney |      |      |      | Heart |     |     |     | Lung |     |     |     | Liver |      |      |      | Cornea |      |      |      |
|-------|--------|------|------|------|-------|-----|-----|-----|------|-----|-----|-----|-------|------|------|------|--------|------|------|------|
| Year  | E      | S    | W    | NI   | E     | S   | W   | NI  | E    | S   | W   | NI  | E     | S    | W    | NI   | E      | S    | W    | NI   |
| 90-91 | 14.6   | 17.4 | 19.0 | 19.2 | 3.9   | 3.9 | 5.4 | 1.9 | 0.0  | 0.0 | 0.0 | 0.0 | 6.0   | 8.2  | 8.6  | 7.1  | 27.8   | 11.4 | 16.7 | 9.9  |
| 91-92 | 13.9   | 14.7 | 21.2 | 25.5 | 3.8   | 3.7 | 6.8 | 5.7 | 0.2  | 0.4 | 0.0 | 0.0 | 7.3   | 7.4  | 12.2 | 14.7 | 29.6   | 12.3 | 29.3 | 14.0 |
| 92-93 | 13.7   | 19.4 | 14.4 | 15.3 | 3.8   | 5.7 | 6.3 | 3.8 | 0.1  | 0.2 | 0.0 | 0.0 | 8.1   | 12.0 | 12.2 | 7.6  | 33.1   | 21.9 | 24.3 | 16.2 |
| 93-94 | 12.9   | 17.3 | 17.6 | 10.8 | 3.9   | 3.9 | 5.0 | 4.5 | 0.2  | 0.2 | 0.0 | 0.6 | 9.8   | 12.0 | 13.5 | 8.9  | 37.5   | 21.0 | 23.9 | 12.7 |
| 94-95 | 13.5   | 15.1 | 25.7 | 19.8 | 4.0   | 4.3 | 6.8 | 5.1 | 0.3  | 0.2 | 0.0 | 0.0 | 10.7  | 11.0 | 18.0 | 12.1 | 37.5   | 21.4 | 28.6 | 15.3 |
| 95-96 | 12.8   | 15.1 | 17.6 | 16.6 | 3.7   | 5.7 | 2.7 | 3.8 | 0.4  | 0.0 | 0.5 | 0.6 | 10.9  | 11.4 | 16.7 | 11.5 | 34.5   | 19.7 | 85.4 | 13.4 |
| 96-97 | 12.8   | 10.5 | 20.0 | 23.8 | 3.3   | 3.3 | 6.8 | 4.5 | 0.6  | 0.2 | 0.4 | 0.6 | 10.9  | 8.2  | 20.4 | 17.5 | 33.0   | 17.1 | 80.7 | 12.2 |
| 97-98 | 11.7   | 12.5 | 18.7 | 16.5 | 2.9   | 3.9 | 5.3 | 4.9 | 0.6  | 0.0 | 0.4 | 0.0 | 11.0  | 10.2 | 18.0 | 14.6 | 26.2   | 14.8 | 48.2 | 5.8  |
| 98-99 | 11.0   | 13.7 | 16.2 | 12.1 | 2.4   | 4.3 | 2.6 | 3.6 | 0.6  | 0.2 | 0.4 | 0.0 | 10.5  | 12.0 | 13.2 | 11.5 | 26.0   | 13.1 | 46.9 | 6.0  |
| 99-00 | 11.7   | 13.1 | 15.0 | 13.3 | 2.0   | 3.9 | 2.2 | 2.4 | 2.0  | 0.4 | 0.4 | 0.0 | 11.2  | 12.0 | 16.3 | 10.2 | 27.1   | 15.6 | 52.0 | 4.8  |
| 00-01 | 11.6   | 9.5  | 13.7 | 12.7 | 2.3   | 1.4 | 1.3 | 1.8 | 2.3  | 0.8 | 1.3 | 1.2 | 11.1  | 9.8  | 14.5 | 12.1 | 30.2   | 16.2 | 31.9 | 7.8  |
| 01-02 | 10.4   | 9.8  | 14.5 | 18.7 | 2.1   | 1.4 | 2.2 | 3.0 | 2.1  | 1.6 | 0.4 | 1.2 | 10.5  | 11.4 | 13.2 | 16.3 | 25.1   | 10.4 | 42.3 | 7.8  |
| 02-03 | 11.0   | 7.9  | 14.2 | 18.5 | 1.6   | 1.6 | 2.7 | 4.2 | 1.6  | 1.8 | 1.8 | 1.8 | 11.6  | 10.0 | 14.2 | 16.1 | 25.4   | 12.8 | 51.3 | 7.7  |
| 03-04 | 10.7   | 7.7  | 18.8 | 17.2 | 1.7   | 1.2 | 1.8 | 1.2 | 1.7  | 1.8 | 0.9 | 1.8 | 11.1  | 8.7  | 19.6 | 15.4 | 28.5   | 8.9  | 62.1 | 8.9  |
| 04-05 | 9.8    | 8.3  | 16.5 | 16.0 | 1.3   | 1.6 | 3.6 | 4.7 | 1.3  | 0.8 | 1.3 | 1.2 | 10.3  | 10.7 | 16.5 | 17.2 | 27.0   | 15.0 | 51.3 | 4.1  |
| 05-06 | 9.4    | 5.5  | 14.7 | 10.1 | 1.2   | 1.8 | 0.9 | 1.8 | 1.2  | 1.8 | 2.2 | 1.8 | 10.4  | 8.5  | 14.3 | 10.1 | 31.1   | 12.7 | 26.6 | 8.9  |
| 06-07 | 8.5    | 6.5  | 15.2 | 16.4 | 1.5   | 1.6 | 4.5 | 2.3 | 1.5  | 0.8 | 0.9 | 2.9 | 10.6  | 6.9  | 17.9 | 19.7 | 32.8   | 15.2 | 36.1 | 8.8  |
| 07-08 | 7.2    | 4.7  | 9.6  | 8.7  | 1.1   | 1.8 | 1.3 | 1.7 | 1.1  | 0.8 | 1.3 | 1.2 | 10.6  | 8.3  | 14.0 | 10.5 | 34.3   | 18.6 | 27.5 | 4.7  |
| 08-09 | 8.2    | 9.0  | 7.9  | 8.7  | 1.3   | 1.0 | 1.3 | 2.3 | 1.3  | 2.2 | 1.8 | 3.5 | 11.2  | 10.8 | 12.2 | 12.2 | 34.4   | 21.1 | 24.0 | 4.1  |

Table 1: UK Donor rates (deceased donors per million population) by organ type 1990-2009.[2]  
(E = England S = Scotland W = Wales NI = Northern Ireland)

1  
2 The results show certain regional differences in donation for four of the organs. With regards  
3  
4 to the liver, the Poisson analysis indicated that Wales and Northern Ireland had statistically  
5  
6 significantly higher donor rates than England and Scotland. The rate of liver donation has  
7  
8 been consistently highest in Wales for the past twenty years and Northern Ireland has  
9  
10 contributed the second highest rate of donation for most of the years examined. Heart  
11  
12 donations were also statistically significantly higher in Wales and Northern Ireland compared  
13  
14 to England. With respect to heart donation, in the first decade examined, with the exception of  
15  
16 1995-6, Wales was the region with the highest overall donation rate until 1998 when it was  
17  
18 overtaken by Scotland and/or Northern Ireland. One or both of these regions dominated in  
19  
20 heart donations over most of the second decade studied (with the exception of 2003-4 and  
21  
22 2006-7 where Wales had the highest donations). The overall rate of heart donations has fallen  
23  
24 over the twenty year period for Wales, Scotland and England; Northern Ireland shows  
25  
26 fluctuations with no consistent trend.  
27  
28  
29  
30  
31  
32  
33  
34  
35  
36

37 In contrast to falling heart donation rates, the rate of lung donation has risen since 1990, with  
38  
39 Northern Ireland being the greatest contributor over most of this period.[2] This  
40  
41 notwithstanding, there were no statistically significant regional variations in lung donations.  
42  
43 It should be noted that lung as well as heart donations have been very low in number in all  
44  
45 regions across all the years compared to other organs and this may reflect the fact that heart  
46  
47 beating donors, on which heart and most lung transplants depend, have been decreasing for  
48  
49 around a decade across the UK.[7]  
50  
51  
52  
53  
54  
55  
56  
57

58 Kidney and corneal donations showed significant regional differences but these were not  
59  
60 consistent across the time period investigated, as indicated by the need to add an interaction

1 term to the models. No discernable pattern emerges from the kidney donation data although it  
2 is perhaps worth noting that for most of the first decade examined, England was the lowest  
3 contributor; in the second decade, with the exception of one year (2008-09), the lowest  
4 contributions came from Scotland.  
5  
6  
7  
8  
9

10  
11  
12  
13 The pattern for corneal donations shows a greater consistency for most regions except Wales,  
14 which contributed significantly more corneal tissue than the other regions between 1995 and  
15 2005 but subsequently decreased to levels comparable to pre-1995 and to those of England.  
16  
17  
18  
19  
20  
21  
22  
23  
24  
25  
26  
27  
28  
29  
30  
31  
32  
33  
34  
35  
36  
37  
38  
39  
40  
41  
42  
43  
44  
45  
46  
47  
48  
49  
50  
51  
52  
53  
54  
55  
56  
57  
58  
59  
60  
There is no obvious reason for this trend. Perhaps the most striking picture to emerge from the  
data shown in Table 1 is the low rate of corneal donations in Northern Ireland, particularly  
when compared with those of England and Wales. Scotland and Northern Ireland were very  
similar in corneal donations in the early part of the first decade examined but subsequently the  
gap increased.

The patterns seen with corneal donations may reflect attitudes based on culture and tradition  
as well as on lack of awareness of what eye donation involves. In Northern Ireland, and to a  
lesser extent in Scotland, the tradition of wakes and burial remains strong. Disfiguring the  
face of a deceased loved one before burial by removing the eyeballs, is unlikely to be  
accepted.[8] There is no eye bank or retrieval centre in Northern Ireland and information  
regarding the effect of collecting eye tissue on facial appearance is not sufficiently well  
explained. In Wales and England, where over 70% of deaths result in cremations (compared  
to around 60% of deaths in Scotland and 15% in Northern Ireland) [9], the issue of the facial  
appearance of the deceased may be of less importance. The presence of an eye bank with  
dedicated staff is the most likely means of increasing corneal donations although it has been  
shown that retrieval rates can be raised effectively by implementing an active policy for



1 corneal donation in accident and emergency departments [10]. This approach would also  
2  
3 apply to other organs.  
4  
5  
6  
7  
8  
9  
10  
11  
12  
13  
14  
15  
16  
17  
18  
19  
20  
21  
22  
23  
24  
25  
26  
27  
28  
29  
30  
31  
32  
33  
34  
35  
36  
37  
38  
39  
40  
41  
42  
43  
44  
45  
46  
47  
48  
49  
50  
51  
52  
53  
54  
55  
56  
57  
58  
59  
60

For peer review only

|                                   | <b>Kidney</b> |    |       |            |             |       | <b>Heart</b>                                                                                                    |    |      |            |             |       |
|-----------------------------------|---------------|----|-------|------------|-------------|-------|-----------------------------------------------------------------------------------------------------------------|----|------|------------|-------------|-------|
| Model                             | Deviance (D)  | df | D/df  | $\Delta D$ | $\Delta df$ | Sig.  | Deviance (D)                                                                                                    | df | D/df | $\Delta D$ | $\Delta df$ | Sig.  |
| M0:<br>Intercept only             | 716.34        | 75 | 9.55  |            |             |       | 600.86                                                                                                          | 75 | 8.01 |            |             |       |
| M1:<br>Intercept + year           | 225.75        | 57 | 3.96  |            |             |       | 87.03                                                                                                           | 57 | 1.53 |            |             |       |
| M1-M0                             |               |    |       | 490.59     | 18          | <.001 |                                                                                                                 |    |      | 513.84     | 18          | <.001 |
| M2:<br>Intercept + year + country | 109.52        | 54 |       |            |             |       | 58.55                                                                                                           | 54 | 1.08 |            |             |       |
| M2-M1                             |               |    |       | 116.23     | 3           | <.001 |                                                                                                                 |    |      | 28.48      | 3           | <.001 |
| M3 (Full)<br>-M2                  |               |    |       | 109.52     | 54          | <.001 |                                                                                                                 |    |      | 58.55      | 54          | .312  |
|                                   | <b>Lung</b>   |    |       |            |             |       | <b>Liver</b>                                                                                                    |    |      |            |             |       |
| Model                             | Deviance (D)  | df | D/df  | $\Delta D$ | $\Delta df$ | Sig.  | Deviance (D)                                                                                                    | df | D/df | $\Delta D$ | $\Delta df$ | Sig.  |
| M0:<br>Intercept only             | 683.13        | 75 | 9.11  |            |             |       | 385.34                                                                                                          | 75 | 5.14 |            |             |       |
| M1:<br>Intercept + year           | 72.99         | 57 | 1.28  |            |             |       | 169.45                                                                                                          | 57 | 2.97 |            |             |       |
| M1-M0                             |               |    |       | 610.14     | 18          | <.001 |                                                                                                                 |    |      | 215.89     | 18          | <.001 |
| M2:<br>Intercept + year + country | 63.26         | 54 | 1.17  |            |             |       | 69.58                                                                                                           | 54 | 1.29 |            |             |       |
| M2-M1                             |               |    |       | 9.73       | 3           | .021  |                                                                                                                 |    |      | 99.87      | 3           | <.001 |
| M3 (Full)<br>-M2                  |               |    |       | 63.26      | 54          | .182  |                                                                                                                 |    |      | 69.58      | 54          | .075  |
|                                   | <b>Cornea</b> |    |       |            |             |       | <b>Key</b><br>Sig = significance level<br>$\Delta D$ = difference between the deviances of the two models being |    |      |            |             |       |
| Model                             | Deviance (D)  | df | D/df  | $\Delta D$ | $\Delta df$ | Sig.  |                                                                                                                 |    |      |            |             |       |
| M0:<br>Intercept                  | 2528.01       | 75 | 33.71 |            |             |       |                                                                                                                 |    |      |            |             |       |
| M1:<br>Intercept + year           | 2040.97       | 57 | 35.81 |            |             |       |                                                                                                                 |    |      |            |             |       |

|                                         |        |    |         |    |       |                                                                                                                                                                                                      |
|-----------------------------------------|--------|----|---------|----|-------|------------------------------------------------------------------------------------------------------------------------------------------------------------------------------------------------------|
| M1-M0                                   |        |    | 487.03  | 18 | <.001 | compared<br><br>$\Delta$ df = difference between the degrees of freedom of the two models being compared<br><br>M3 (Full) = model including intercept, year, country, and year x country interaction |
| M2:<br>Intercept<br>+ year +<br>country | 461.11 | 54 | 8.54    |    |       |                                                                                                                                                                                                      |
| M2-M1                                   |        |    | 1579.87 | 3  | <.001 |                                                                                                                                                                                                      |
| M3<br>(Full)-M2                         |        |    | 461.11  | 54 | <.001 |                                                                                                                                                                                                      |

Table 2: Poisson regression analysis of number of organ donations under a variety of models

For peer review only

1  
2  
3  
4  
5  
6  
7  
8  
9  
10  
11  
12  
13  
14  
15  
16  
17  
18  
19  
20  
21  
22  
23  
24  
25  
26  
27  
28  
29  
30  
31  
32  
33  
34  
35  
36  
37  
38  
39  
40  
41  
42  
43  
44  
45  
46  
47

*Can parallels be drawn from the EU?*

1  
2  
3  
4 It has been suggested that at least 20-30 deceased donors per million population would be  
5 necessary to meet the UK's increasing demands.[11] The British Medical Association called  
6 for changes in legislation, suggesting a system of presumed consent that allows for objections  
7 of relatives.[12] The Organ Donation Taskforce was commissioned in 2008 to consider the  
8 potential effects of such legislation and concluded that a change to presumed consent at this  
9 time was unlikely to increase organ donation rates, may incur prohibitive costs and could  
10 result in a backlash; other factors needed to be considered before introducing legislative  
11 change.[13]  
12  
13  
14  
15  
16  
17  
18  
19  
20  
21  
22  
23  
24

25 Bird and Harris modelled situations with varying relative refusal rates and drew on  
26 comparisons with EU countries that already adopted presumed consent systems.[14]  
27 However, presumed consent for organ donation has been implemented with varying effect in  
28 the EU. Adoption and successful implementation of laws in one country should not be taken  
29 as a guarantee of similar success in another. Hence, though Sweden applies presumed  
30 consent, its donation rate in 2009, at 13.8 deceased donors per million population,[6] was  
31 comparable to that of Germany (14.5 deceased donors per million population) and Denmark  
32 (14.0 deceased donors per million population);[5] both of which require informed consent  
33 (Figure 2). The figures available for Ireland, where informed consent is needed, were 21.2  
34 deceased donors per million population in 2009.[4] The nation with the highest donor rate  
35 (34.4 deceased donors per million population in 2009)[15], and one often cited as evidence of  
36 successful implementation of presumed consent legislation[16], is Spain which operates a  
37 "soft" form of presumed consent where next of kin can object to organ donation[15-16]. Yet,  
38 the impact of the legislation has been questioned and the high rate of donor activity attributed  
39 to the "Spanish Model"[15-16] that demands an integrated approach with dedicated  
40 transplant co-ordinators, mainly intensive care physicians, involved in procurement[16]. This  
41  
42  
43  
44  
45  
46  
47  
48  
49  
50  
51  
52  
53  
54  
55  
56  
57  
58  
59  
60

1 highly coordinated network and the respect for autonomy given to the individual and their  
2 relatives, is credited with improving donation rates of 14.3 deceased donors per million  
3 population in 1989 to rates of 33-35 deceased donors per million population in recent  
4 years.[15-16] The majority of donations in Spain are from heart-beating donors in intensive  
5 care; live organ donation and that from non-heart beating donors is relatively low[16]. The  
6 converse is true in the UK and estimates suggest that even if a theoretical upper limit were  
7 reached, with present facilities and practices, heart beating donor numbers in the UK would  
8 only reach half of those in Spain.[16] Given that Spain introduced presumed consent in  
9 1979[3], it is clear that a legislative change alone was not sufficient to improve donation  
10 rates. It is notable that Spain achieves a significantly higher rate of donation than does  
11 Austria [5] which relies upon a “hard” approach in which views of relatives are not routinely  
12 sought.

13  
14  
15  
16  
17  
18  
19  
20  
21  
22  
23  
24  
25  
26  
27  
28  
29  
30  
31 Comparisons across the EU further indicate that whilst a country may have relatively low  
32 overall donation rates, for certain organs the trend may be reversed. Sweden lags behind  
33 countries like Austria, Belgium, Germany and the Netherlands with regard to overall  
34 deceased donations but has had the highest kidney donation rate for the majority of the past  
35 13 years.[5-6]

## 36 37 38 39 40 41 42 43 44 45 46 **Conclusions**

47  
48  
49 Data from the four UK regions show that organ donation rates vary over the last two decades  
50 and that for two of the organs, kidney and cornea, the significance of regional variations is  
51 moderated by variations in time. The cornea, in particular, shows shortfalls in donation rates  
52 from Northern Ireland. Further exploration of underlying regional differences and temporal  
53 variations in organ donation as well as organisational issues, practices and attitudes that may  
54 affect organ donation, needs to be undertaken before considering legislation to admit

1  
2  
3  
4  
5  
6  
7  
8  
9  
presumed consent. Comparison of EU nations, and particularly Spain, indicates that  
10  
11  
12  
13  
14  
15  
16  
17  
18  
19  
20  
21  
22  
23  
24  
25  
26  
27  
28  
29  
30  
31  
32  
33  
34  
35  
36  
37  
38  
39  
improvement of organ donation rates is unlikely to be achieved by introducing new  
40  
41  
42  
43  
44  
45  
46  
47  
48  
49  
50  
51  
52  
53  
54  
55  
56  
57  
58  
59  
60  
legislation alone.

**Provenance/Contributorship:** Barbara Pierscionek is a Professor of Vision Science at the  
School of Biomedical Science, University of Ulster. She is qualified in science and law,  
teaches ethics and law and researches the biology and physics of ageing as well as healthcare  
ethics and presumed consent. Gordon Rae is a Professor of Psychology at the School of  
Psychology, University of Ulster, trained in mathematics and statistics as well as psychology  
and his research interests include applying statistical methods to psychology and medicine.  
Carol McClenahan is a lecturer in Psychology at the School of Psychology, University of  
Ulster. Her research expertise is in attitude and behavioural change in relation to health. She  
also has an interest in ethics in psychology and health. Donal McGlade is currently  
undertaking a PhD on attitudes that determine behaviour with respect to organ donation. All  
authors were involved in preparation of the manuscript. Barbara Pierscionek is the guarantor.

“All authors have completed the Unified Competing Interest form at  
[www.icmje.org/coi\\_disclosure.pdf](http://www.icmje.org/coi_disclosure.pdf) (available on request from the corresponding author)  
(URL) and declare that all authors had: (1) No financial support for the submitted work from  
anyone other than their employer; (2) No financial relationships with commercial entities  
that might have an interest in the submitted work; (3) No spouses, partners, or children with  
relationships with commercial entities that might have an interest in the submitted work; (4)  
No Non-financial interests that may be relevant to the submitted work.”

“This research received no specific grant from any funding agency in the public, commercial  
or not-for-profit sectors.”

1  
2  
3 “The Corresponding Author has the right to grant on behalf of all authors and does grant on  
4 behalf of all authors, an exclusive licence (or non-exclusive for government employees) on a  
5 worldwide basis to the BMJ Group and co-owners or contracting owning societies (where  
6 published by the BMJ Group on their behalf), and its Licensees to permit this article (if  
7 accepted) to be published in BMJ Open and any other BMJ Group products and to exploit all  
8 subsidiary rights, as set out in our licence.”  
9  
10  
11  
12  
13  
14  
15  
16

17  
18 **Acknowledgements:** The authors would like to acknowledge the valuable comments of  
19 reviewers Professors Collett and Atkinson which have served to improve the statistical  
20 analysis of the paper.  
21  
22  
23  
24  
25  
26  
27  
28  
29

### 30 **References**

- 31  
32  
33 1. Murphy P, Smith M. A historic opportunity to improve organ donation in the UK. *Br J*  
34 *Anaesth* 2008;100:735-737.  
35  
36  
37  
38 2. NHSBT. Personal communication with principal statistician at NHSBT, 16<sup>th</sup> November  
39 2010.  
40  
41  
42  
43 3. Gabel H. Organ donor registers. *Curr Opin Organ Transplant* 2006;11:187-193.  
44  
45 4. Organ Procurement Service. Annual Report 2008-2009. Dublin: Organ Procurement  
46 Service; 2008-2009.  
47  
48  
49 5. Cohen B, Persijn G. Annual Report 1997-2009. Eurotransplant International Foundation;  
50 1997-2009.  
51  
52  
53  
54 6. Scandiatransplant. Personal communication with assistant to the medical director at  
55 Scandiatransplant, 27th January 2011.  
56  
57  
58  
59  
60

- 1  
2  
3  
4  
5  
6  
7  
8  
9  
10  
11  
12  
13  
14  
15  
16  
17  
18  
19  
20  
21  
22  
23  
24  
25  
26  
27  
28  
29  
30  
31  
32  
33  
34  
35  
36  
37  
38  
39  
40  
41  
42  
43  
44  
45  
46  
47  
48  
49  
50  
51  
52  
53  
54  
55  
56  
57  
58  
59  
60
7. NHS Blood & Transplant. Transplant activity in the UK: Activity report 2009/10. Bristol: NHS Blood & Transplant; 2010.
8. Kent B, Owens RG. Conflicting attitudes to corneal and organ donation: a study of nurses attitudes to organ donation. *Int J Nurs Stud* 1995;32:484-492.
9. The Cremation Society of Great Britain. Table of cremations carried out in the United Kingdom [Internet]. 2008 [updated 2010 Oct 27; cited 2010 Oct 27]. Available from: <http://www.srgw.demon.co.uk/cremsoc/>
10. Long J, Walsh D, Ritchie DAW, Russell F. Corneal Donation in the Accident and Emergency Department: observational study. *BMJ*, 2000; 321: 1263-1264.
11. Cameron S, Forsythe J. How can we improve organ donation rates? Research into the identification of factors which may influence the variation. *Nefrologia* 2001;21:68-77.
12. British Medical Association Medical Ethics Committee. Organ donation in the 21<sup>st</sup> century: Time for a consolidated approach. London: British Medical Association; 2000.
13. Organ Donation Taskforce. The potential impact of an opt out system for organ donation in the UK: an independent report from the Organ Donation Taskforce. UK Department of Health; 2008.
14. Bird SM, Harris J. Time to move to presumed consent for organ donation. *BMJ* 2010;340:c2188.
15. Matesanz R, Marazuela R, Domínguez-Gil B, et al. The 40 donors per million population plan: an action plan for improvement of organ donation and transplantation in Spain. *Transplant Proc* 2009;41:3453-3456.
16. Fabre J, Murphy P, Matesanz R. Presumed consent: a distraction in the quest for increasing rates of organ donation. *BMJ* 2010;341:c4973



**Figure captions**

Figure 1: a) Organ donor registration rates in England, Wales, Scotland and Northern Ireland 1994-2009.[2] b) Organ donation rates in England, Wales, Scotland and Northern Ireland 1990-2009.[2]

Figure 2: Organ donor rates in selected EU countries 1997-2009.[5-6]

For peer review only

## ■ Research review guidelines : modified from RATS guidelines

| ASK THIS OF THE MANUSCRIPT                                                                                                                                                                                                             | THIS SHOULD BE INCLUDED IN THE MANUSCRIPT                                                                                                                                                         | ✓<br><>           |
|----------------------------------------------------------------------------------------------------------------------------------------------------------------------------------------------------------------------------------------|---------------------------------------------------------------------------------------------------------------------------------------------------------------------------------------------------|-------------------|
| <p><b>R Relevance of study question</b></p> <p>Is the research question interesting?</p> <p>Is the research question relevant to clinical practice, public health, or policy? <i>It is relevant to policy</i></p>                      | <p>Research question explicitly stated</p> <p>Research question justified and linked to the existing knowledge base (empirical research, theory, policy)</p>                                      | <p>✓</p> <p>✓</p> |
| <p><b>A Appropriateness of the method</b></p> <p>Is the methodology used the best approach for the study aims?</p>                                                                                                                     | <p>Study design described and justified : <i>data for all organ donations and registrations was required in order to compare trends across the four UK regions.</i></p>                           | <p>✓</p>          |
| <p><b>T Transparency of procedures</b></p> <p><i>Data collection</i></p> <p>Was collection of data systematic and comprehensive?</p> <p>Why and when was data collection stopped, and is this reasonable?</p>                          | <p>Method (s) outlined : <i>all available data from centralized sources collected</i></p> <p>End of data collection justified and described: <i>all available complete data was collected</i></p> | <p>✓</p> <p>✓</p> |
| <p><b>S Soundness of interpretive approach</b></p> <p><i>Analysis</i></p> <p>Is the type of analysis appropriate for the type of study?</p> <p>Are the interpretations clearly presented and adequately supported by the evidence?</p> | <p>Analytic approach described in depth and justified</p> <p>Statistical analysis conducted using appropriate test</p> <p>Analysis, presentation and interpretation provided</p>                  | <p>✓</p> <p>✓</p> |
| <p><i>Discussion and presentation</i></p>                                                                                                                                                                                              |                                                                                                                                                                                                   |                   |

1  
2  
3  
4  
5  
6  
7  
8  
9  
10  
11  
12  
13  
14  
15  
16  
17  
18  
19  
20  
21  
22  
23  
24  
25  
26  
27  
28  
29  
30  
31  
32  
33  
34  
35  
36  
37  
38  
39  
40  
41  
42  
43  
44  
45  
46  
47  
48  
49  
50  
51  
52  
53  
54  
55  
56  
57  
58  
59  
60

Is adequate account taken of previous knowledge and how the findings add?

Findings presented with reference to existing literature, and how they contribute

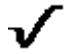

Is the manuscript well written and accessible?

Evidence of following guidelines (format, word count)  
Written for a health sciences audience

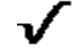

For peer review only

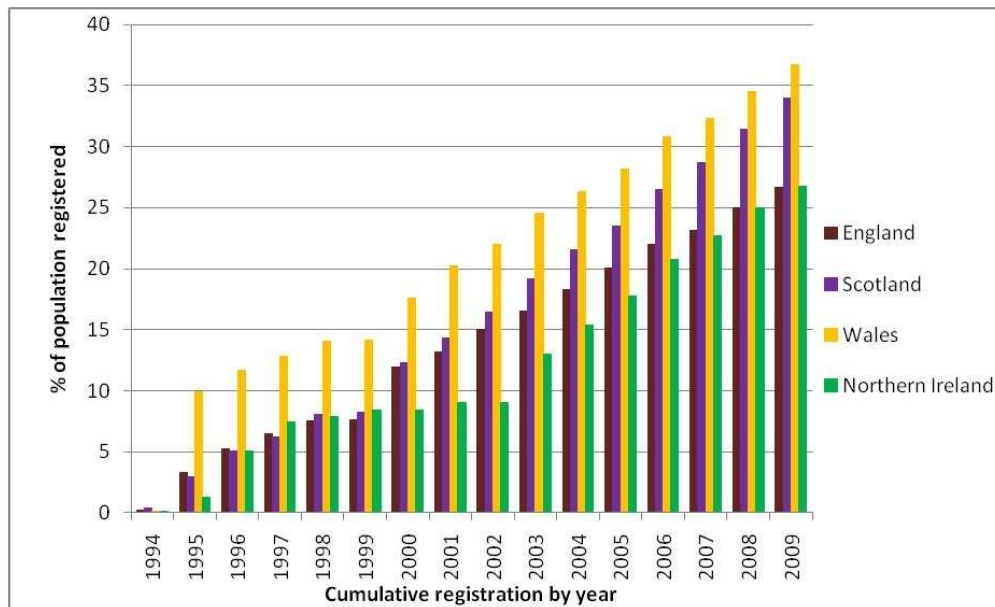

39x23mm (600 x 600 DPI)

1  
2  
3  
4  
5  
6  
7  
8  
9  
10  
11  
12  
13  
14  
15  
16  
17  
18  
19  
20  
21  
22  
23  
24  
25  
26  
27  
28  
29  
30  
31  
32  
33  
34  
35  
36  
37  
38  
39  
40  
41  
42  
43  
44  
45  
46  
47  
48  
49  
50  
51  
52  
53  
54  
55  
56  
57  
58  
59  
60

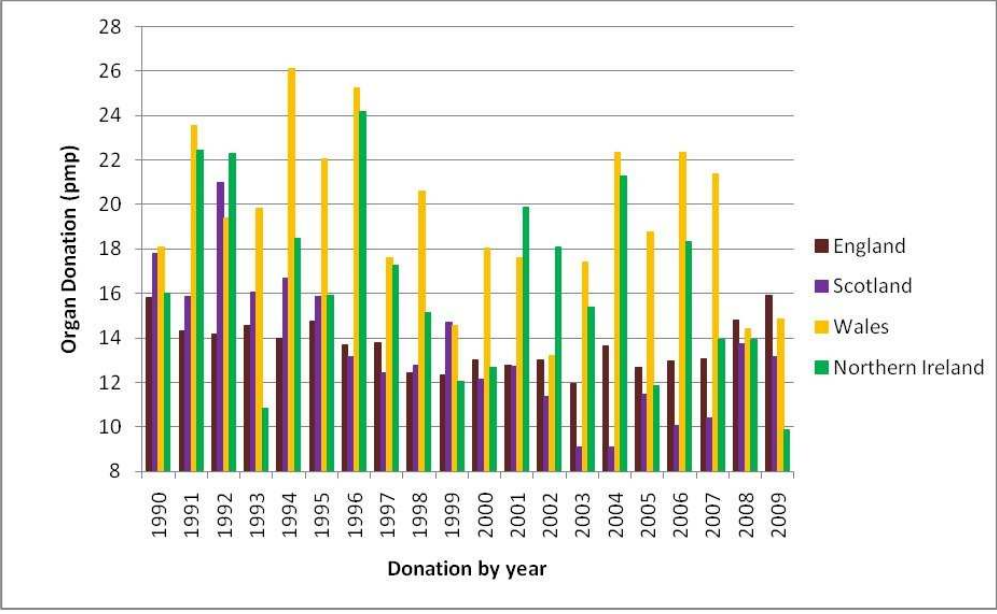

39x24mm (600 x 600 DPI)

Review only

1  
2  
3  
4  
5  
6  
7  
8  
9  
10  
11  
12  
13  
14  
15  
16  
17  
18  
19  
20  
21  
22  
23  
24  
25  
26  
27  
28  
29  
30  
31  
32  
33  
34  
35  
36  
37  
38  
39  
40  
41  
42  
43  
44  
45  
46  
47  
48  
49  
50  
51  
52  
53  
54  
55  
56  
57  
58  
59  
60

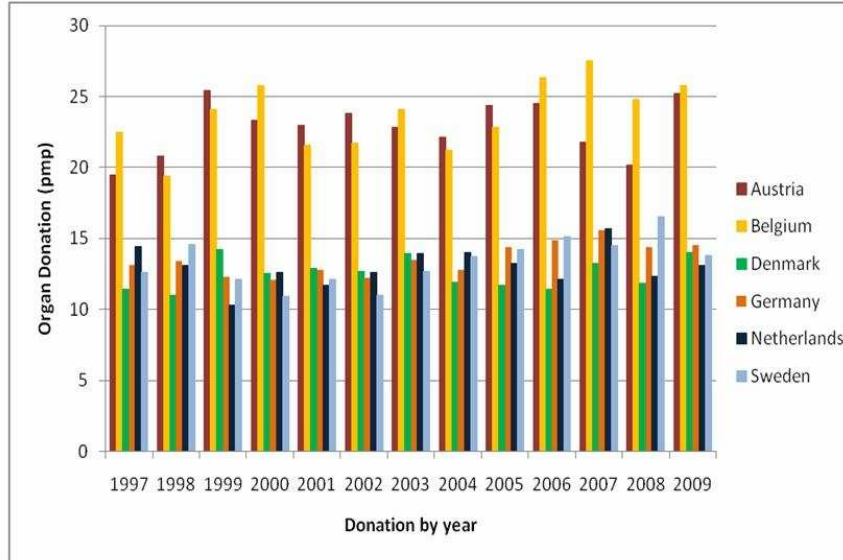

Figure 2

254x190mm (96 x 96 DPI)

ew only

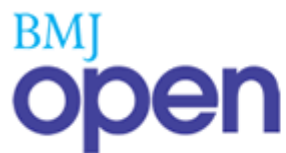

**Regional and temporal variations in organ donation across the UK: secondary analysis of databases**

|                                 |                                                                                                                                                                                                                                      |
|---------------------------------|--------------------------------------------------------------------------------------------------------------------------------------------------------------------------------------------------------------------------------------|
| Journal:                        | <i>BMJ Open</i>                                                                                                                                                                                                                      |
| Manuscript ID:                  | BMJ Open.2010.000055.R3                                                                                                                                                                                                              |
| Article Type:                   | Research                                                                                                                                                                                                                             |
| Date Submitted by the Author:   | 02-Aug-2011                                                                                                                                                                                                                          |
| Complete List of Authors:       | McGlade, Donal; University of Ulster, Biomedical Sciences<br>Rae, Gordon; University of Ulster, Psychology<br>McClenahan, Carol; University of Ulster, Psychology<br>Pierscionek, Barbara; University of Ulster, Biomedical Sciences |
| <b>Primary Subject Heading</b>: | Health policy                                                                                                                                                                                                                        |
| Keywords:                       | Health policy < HEALTH SERVICES ADMINISTRATION & MANAGEMENT, Transplant medicine < INTERNAL MEDICINE, LAW (see Medical Law), organ donation, presumed consent, UK regional variations                                                |
|                                 |                                                                                                                                                                                                                                      |

SCHOLARONE™  
Manuscripts

only

## Regional and temporal variations in organ donation across the UK

*(Research: secondary analysis of databases)*

Donal McGlade[1], Gordon Rae[2], Carol McClenahan[2], Barbara Pierscionek[1,\*]

1. School of Biomedical Science, University of Ulster, Cromore Road  
Coleraine, BT52 1SA
2. School of Psychology, University of Ulster, Cromore Road, Coleraine,  
BT52 1SA

\*Corresponding author email [b.pierscionek@ulster.ac.uk](mailto:b.pierscionek@ulster.ac.uk) telephone: 02870123293

**Key words:** *organ donation, presumed consent, UK regional variations, EU organ donation*

Word count: 2621 words



1  
2  
3  
4 **Objectives:** To explore regional variations in donation of cadaveric solid organs and tissues  
5  
6 across the four devolved health administrations of the UK (England, Scotland, Wales &  
7  
8 Northern Ireland).  
9

10  
11 **Design:** A secondary analysis of databases from NHS Blood & Transplant (1990-2009) and  
12  
13 from the National Organ Procurement Service for the Republic of Ireland, Eurotransplant  
14  
15 International Foundation and Scandiatransplant.  
16  
17

18  
19 **Results:** After adjusting for time, statistically significant differences were found among the  
20  
21 four regions ( $p < 0.001$ ) for liver donations. The only exceptions were between England and  
22  
23 Scotland and between Wales and Northern Ireland where the differences were not significant  
24  
25 following a Bonferroni correction ( $p > 0.008$ ). England had significantly fewer heart donations  
26  
27 than both Wales ( $p < 0.001$ ) and Northern Ireland ( $p = 0.005$ ). There were no significant  
28  
29 differences among the four regions for lung donations. Regional variations in kidney and  
30  
31 corneal donations were moderated by time. Northern Ireland, however, has had consistently  
32  
33 lower corneal donation rates than the other three regions.  
34  
35  
36  
37

38  
39 **Conclusion:** Organ donation rates over the last two decades vary in the four UK regions and  
40  
41 this variation depends on the type of organ donated. Further exploration of underlying  
42  
43 factors, organisational issues, practices and attitudes to organ donation in the four regions of  
44  
45 the UK, taking into account findings from EU countries with varying approaches to presumed  
46  
47 consent, needs to be undertaken before such legislation is introduced across the UK.  
48  
49  
50

51  
52  
53  
54 **Article focus:**  
55

- 56  
57 - To investigate organ donation of cadaveric solid organs and tissues across the four  
58  
59 devolved health administrations of the UK and how they vary with time;  
60

- 1  
2  
3  
4  
5
- To consider reasons for regional variations and those related to organ type, drawing on regional differences in culture and practice and on findings in other EU countries.

6  
7  
8

**Key messages:**

- 9  
10  
11  
12  
13  
14  
15  
16  
17  
18  
19  
20  
21  
22  
23  
24  
25  
26  
27  
28
- organ donation and registration rates vary with time across the four regions of UK;
  - heart and liver donations are highest in Wales and Northern Ireland;
  - the significance of regional variations on kidney and corneal donation rates is moderated by the effect of changes over time; Northern Ireland consistently has the lowest corneal donation rate;
  - the reasons for regional variations require further investigation as well as comparisons with practices and attitudes in other EU states

29  
30  
31

**Strengths & limitations:**

32  
33

The strengths of this article are:

- 34  
35  
36  
37  
38  
39  
40  
41  
42  
43  
44  
45
- its novelty, as this is the first article that has analysed data across the UK and shown patterns in donation rates in the four regions over the last two decades;
  - its timeliness given the shortfall in organ donations, the continuing debate about presumed consent and its importance in investigating regional differences

46  
47  
48

The limitation of this article is:

- 49  
50  
51  
52  
53  
54  
55  
56  
57  
58  
59  
60
- data from other EU countries, for the entire time period investigated, were not available

## Introduction

1  
2  
3 Approximately 80-90% of the UK population support the principle of organ donation[1], yet  
4  
5 only 29% of the population carry an organ donor card.[2] Despite advances in transplantation  
6  
7 medicine, organ shortage is the single most limiting factor preventing potential recipients  
8  
9 from receiving the benefits of transplantation.[3] If the overwhelming support for organ  
10  
11 donation could be directly translated into a willingness to donate, this should bode well for a  
12  
13 presumed consent system (allowing organs to be used for transplantation unless the  
14  
15 individual has explicitly objected). However, interpretation of these findings is far from  
16  
17 simple. This paper presents an analysis of data of organ donation and registration in the four  
18  
19 regions of the UK for five organ types: kidney, liver, heart, lung and cornea in order to  
20  
21 determine whether significant differences exist across the four regions and whether these vary  
22  
23 depending on the organ. Any variations may be influenced by factors that could subsequently  
24  
25 affect whether or not a presumed consent system, especially one that included the consent of  
26  
27 relatives, were to be successful or whether it may create regional inequalities. Comparisons  
28  
29 are made to European nations that have adopted presumed consent as well as to those that  
30  
31 have not in order to see whether such factors may be discernable.  
32  
33  
34  
35  
36  
37  
38  
39  
40

## Methods

41  
42  
43 Information about all organ donations and registration in the four regions of the UK:  
44  
45 England, Scotland, Wales and Northern Ireland was obtained from NHS Blood & Transplant  
46  
47 for all available years: from 1990-2009. Data from other European nations was provided from  
48  
49 the National Organ Procurement Service for the Republic of Ireland [4], Eurotransplant  
50  
51 International Foundation [5] and Scandiatransplant [6]. Statistical analyses were carried out  
52  
53 using Poisson regression (SPSS version 17). Bonferroni corrections were used to control for  
54  
55 Type I errors when making inter-regional comparisons.  
56  
57  
58  
59  
60

## Results and Discussion

### *Regional variations in registration and donation*

The UK currently operates a system of informed consent requiring individuals who wish to donate, to formally register their intention on a centralised register. Figure 1a shows that since the organ donor register was first launched in 1994, Wales has consistently outperformed other parts of the UK in terms of the percentage of population registered, with Scotland in second position, England third and Northern Ireland last. (A caveat is that although records are updated periodically to remove those who have died subsequent to being registered, organ donor registration rates may still include some entries of deceased individuals. This should not, however, affect regional variations).

When the registration rates are compared to donation rates, the trends are somewhat different. The rate of organ donation is consistently higher in Wales than the UK average for the majority of the last 20 years (Figure 1b). Donation rates in Northern Ireland are the second highest, achieving a higher than UK average in 13 of those years, with Scotland achieving this in 6 years and England capable of achieving this in only 3 years. So whilst registration and donation are both highest in Wales, amongst the other parts of the UK registration and donation do not follow similar trends. In Northern Ireland, for example, where willingness to register as an organ donor is lower than any other UK region, the organ donation rate is generally higher than in England or Scotland. It is also notable that whilst England exhibits the least variation in organ donation over the last two decades, Scotland shows an overall decrease in donation with trends in Wales and Northern Ireland varying from year to year with the greatest fluctuations in the latter.

*Variations in donation according to organ type*

1  
2  
3  
4 Masked by general variations in donation are the figures for individual organs. Table 1 shows  
5  
6 the rate of donation for each region of the UK for different organs. Poisson regression  
7  
8 analyses were carried out on the numbers of organ donations (entries in Table 1 x the  
9  
10 population for each country in that year expressed in millions) using the Generalized Linear  
11  
12 Models program in SPSS Version 17. The offset was the natural logarithm of the total  
13  
14 population for each country, which varied slightly from year to year. Separate analyses were  
15  
16 carried out for each organ because donors may donate more than one organ and hence a  
17  
18 single model analysis would violate the assumption of independent observations. Four  
19  
20 different models were considered: the intercept only model, M0, which included no  
21  
22 explanatory variables; model M1, which included the explanatory variable year (as well as  
23  
24 the intercept); model M2 which included the explanatory variables year and country; and the  
25  
26 full or saturated model M3 which includes the explanatory variables year and country and  
27  
28 their interaction. Pairs of models were compared using the differences between their deviance  
29  
30 values ( $\Delta D$ ). This statistic is a large-sample chi-squared statistic with degrees of freedom  
31  
32 equal to the difference between the residual df values for the two model. Model M1 was a  
33  
34 statistically significant improvement over model M0 and model M2 was a significant  
35  
36 improvement over model M1 (in all cases the value of  $\Delta D$  was significant at  $p < 0.001$ ). In  
37  
38 the case of liver, lung and heart, model M2 was not statistically significantly different from  
39  
40 the saturated model M3. Since the two models have comparable fit, the former was selected  
41  
42 on the grounds that it is the more parsimonious (requires fewer parameters to be estimated).  
43  
44 Applying model M2 for the liver, Wales had significantly higher counts than England and  
45  
46 Scotland (Wald chi-square 90.23, df = 1,  $p < 0.001$ ; 65.12, df = 1,  $p < 0.001$  respectively) and  
47  
48 Northern Ireland had significantly higher counts than England and Scotland (Wald chi-square  
49  
50 21.34, df = 1,  $p < 0.001$ ; 19.04, df = 1,  $p < 0.001$ , respectively). After a Bonferroni correction  
51  
52 (six comparisons carried out, original alpha = 0.05, adjusted significance level =  $0.05/6 =$   
53  
54  
55  
56  
57  
58  
59  
60

1 0.008) there was no statistically significant difference between England and Scotland nor  
2  
3 between Wales and Northern Ireland (Wald chi-square 0.506, df = 1, p = 0.477; 5.76, df = 1,  
4  
5 p = 0.016). For the lung there were no statistically significant differences between the  
6  
7 regions. In the case of the heart, England had significantly fewer donations than Wales and  
8  
9 Northern Ireland (Wald chi-square 19.86, df = 1, p<0.001; 8.06, df = 1, p = 0.005,  
10  
11 respectively). There were no significant differences between Scotland and the other three  
12  
13 regions after applying a Bonferroni correction.  
14  
15  
16  
17  
18  
19  
20

21 For the cornea and kidney, model M2 was a significantly poorer fit than the saturated model.  
22  
23 (There was also substantial overdispersion as indicated by the values of D/df which was not  
24  
25 corrected using a negative binomial as an alternative model). These findings suggest that for  
26  
27 these organs the effect of country was moderated by year. For example, in the case of the  
28  
29 cornea the donor rates per million for Scotland and Northern Ireland were quite close in  
30  
31 1991-92 (12.3 and 14.0 respectively) whereas in 2008-9 there was a substantial discrepancy  
32  
33 (21.1 and 4.1 respectively). Inspection of the Poisson interaction term indicated that the  
34  
35 difference between Scotland and Northern Ireland in 2008-9 (17.0) was significantly greater  
36  
37 (p<0.001) than the difference between the two regions in 1991-92.  
38  
39  
40  
41  
42  
43  
44  
45  
46  
47  
48  
49  
50  
51  
52  
53  
54  
55  
56  
57  
58  
59  
60

| Year  | Kidney |      |      |      | Heart |     |     |     | Lung |     |     |     | Liver |      |      |      | Cornea |      |      |      |
|-------|--------|------|------|------|-------|-----|-----|-----|------|-----|-----|-----|-------|------|------|------|--------|------|------|------|
|       | E      | S    | W    | NI   | E     | S   | W   | NI  | E    | S   | W   | NI  | E     | S    | W    | NI   | E      | S    | W    | NI   |
| 90-91 | 14.6   | 17.4 | 19.0 | 19.2 | 3.9   | 3.9 | 5.4 | 1.9 | 0.0  | 0.0 | 0.0 | 0.0 | 6.0   | 8.2  | 8.6  | 7.1  | 27.8   | 11.4 | 16.7 | 9.9  |
| 91-92 | 13.9   | 14.7 | 21.2 | 25.5 | 3.8   | 3.7 | 6.8 | 5.7 | 0.2  | 0.4 | 0.0 | 0.0 | 7.3   | 7.4  | 12.2 | 14.7 | 29.6   | 12.3 | 29.3 | 14.0 |
| 92-93 | 13.7   | 19.4 | 14.4 | 15.3 | 3.8   | 5.7 | 6.3 | 3.8 | 0.1  | 0.2 | 0.0 | 0.0 | 8.1   | 12.0 | 12.2 | 7.6  | 33.1   | 21.9 | 24.3 | 16.2 |
| 93-94 | 12.9   | 17.3 | 17.6 | 10.8 | 3.9   | 3.9 | 5.0 | 4.5 | 0.2  | 0.2 | 0.0 | 0.6 | 9.8   | 12.0 | 13.5 | 8.9  | 37.5   | 21.0 | 23.9 | 12.7 |
| 94-95 | 13.5   | 15.1 | 25.7 | 19.8 | 4.0   | 4.3 | 6.8 | 5.1 | 0.3  | 0.2 | 0.0 | 0.0 | 10.7  | 11.0 | 18.0 | 12.1 | 37.5   | 21.4 | 28.6 | 15.3 |
| 95-96 | 12.8   | 15.1 | 17.6 | 16.6 | 3.7   | 5.7 | 2.7 | 3.8 | 0.4  | 0.0 | 0.5 | 0.6 | 10.9  | 11.4 | 16.7 | 11.5 | 34.5   | 19.7 | 85.4 | 13.4 |
| 96-97 | 12.8   | 10.5 | 20.0 | 23.8 | 3.3   | 3.3 | 6.8 | 4.5 | 0.6  | 0.2 | 0.4 | 0.6 | 10.9  | 8.2  | 20.4 | 17.5 | 33.0   | 17.1 | 80.7 | 12.2 |
| 97-98 | 11.7   | 12.5 | 18.7 | 16.5 | 2.9   | 3.9 | 5.3 | 4.9 | 0.6  | 0.0 | 0.4 | 0.0 | 11.0  | 10.2 | 18.0 | 14.6 | 26.2   | 14.8 | 48.2 | 5.8  |
| 98-99 | 11.0   | 13.7 | 16.2 | 12.1 | 2.4   | 4.3 | 2.6 | 3.6 | 0.6  | 0.2 | 0.4 | 0.0 | 10.5  | 12.0 | 13.2 | 11.5 | 26.0   | 13.1 | 46.9 | 6.0  |
| 99-00 | 11.7   | 13.1 | 15.0 | 13.3 | 2.0   | 3.9 | 2.2 | 2.4 | 2.0  | 0.4 | 0.4 | 0.0 | 11.2  | 12.0 | 16.3 | 10.2 | 27.1   | 15.6 | 52.0 | 4.8  |
| 00-01 | 11.6   | 9.5  | 13.7 | 12.7 | 2.3   | 1.4 | 1.3 | 1.8 | 2.3  | 0.8 | 1.3 | 1.2 | 11.1  | 9.8  | 14.5 | 12.1 | 30.2   | 16.2 | 31.9 | 7.8  |
| 01-02 | 10.4   | 9.8  | 14.5 | 18.7 | 2.1   | 1.4 | 2.2 | 3.0 | 2.1  | 1.6 | 0.4 | 1.2 | 10.5  | 11.4 | 13.2 | 16.3 | 25.1   | 10.4 | 42.3 | 7.8  |
| 02-03 | 11.0   | 7.9  | 14.2 | 18.5 | 1.6   | 1.6 | 2.7 | 4.2 | 1.6  | 1.8 | 1.8 | 1.8 | 11.6  | 10.0 | 14.2 | 16.1 | 25.4   | 12.8 | 51.3 | 7.7  |
| 03-04 | 10.7   | 7.7  | 18.8 | 17.2 | 1.7   | 1.2 | 1.8 | 1.2 | 1.7  | 1.8 | 0.9 | 1.8 | 11.1  | 8.7  | 19.6 | 15.4 | 28.5   | 8.9  | 62.1 | 8.9  |
| 04-05 | 9.8    | 8.3  | 16.5 | 16.0 | 1.3   | 1.6 | 3.6 | 4.7 | 1.3  | 0.8 | 1.3 | 1.2 | 10.3  | 10.7 | 16.5 | 17.2 | 27.0   | 15.0 | 51.3 | 4.1  |
| 05-06 | 9.4    | 5.5  | 14.7 | 10.1 | 1.2   | 1.8 | 0.9 | 1.8 | 1.2  | 1.8 | 2.2 | 1.8 | 10.4  | 8.5  | 14.3 | 10.1 | 31.1   | 12.7 | 26.6 | 8.9  |
| 06-07 | 8.5    | 6.5  | 15.2 | 16.4 | 1.5   | 1.6 | 4.5 | 2.3 | 1.5  | 0.8 | 0.9 | 2.9 | 10.6  | 6.9  | 17.9 | 19.7 | 32.8   | 15.2 | 36.1 | 8.8  |
| 07-08 | 7.2    | 4.7  | 9.6  | 8.7  | 1.1   | 1.8 | 1.3 | 1.7 | 1.1  | 0.8 | 1.3 | 1.2 | 10.6  | 8.3  | 14.0 | 10.5 | 34.3   | 18.6 | 27.5 | 4.7  |
| 08-09 | 8.2    | 9.0  | 7.9  | 8.7  | 1.3   | 1.0 | 1.3 | 2.3 | 1.3  | 2.2 | 1.8 | 3.5 | 11.2  | 10.8 | 12.2 | 12.2 | 34.4   | 21.1 | 24.0 | 4.1  |

Table 1: UK Donor rates (deceased donors per million population) by organ type 1990-2009.  
(E = England S = Scotland W = Wales NI = Northern Ireland)

1 The results show certain regional differences in donation for four of the organs. With regards  
2 to the liver, the Poisson analysis indicated that Wales and Northern Ireland had statistically  
3 significantly higher donor rates than England and Scotland. The rate of liver donation has  
4 been consistently highest in Wales for the past twenty years and Northern Ireland has  
5 contributed the second highest rate of donation for most of the years examined. Heart  
6 donations were also statistically significantly higher in Wales and Northern Ireland compared  
7 to England. With respect to heart donation, in the first decade examined, with the exception of  
8 1995-6, Wales was the region with the highest overall donation rate until 1998 when it was  
9 overtaken by Scotland and/or Northern Ireland. One or both of these regions dominated in  
10 heart donations over most of the second decade studied (with the exception of 2003-4 and  
11 2006-7 where Wales had the highest donations). The overall rate of heart donations has fallen  
12 over the twenty year period for Wales, Scotland and England; Northern Ireland shows  
13 fluctuations with no consistent trend.  
14  
15  
16  
17  
18  
19  
20  
21  
22  
23  
24  
25  
26  
27  
28  
29  
30  
31  
32  
33  
34

35 In contrast to falling heart donation rates, the rate of lung donation has risen since 1990, with  
36 Northern Ireland being the greatest contributor over most of this period. This  
37 notwithstanding, there were no statistically significant regional variations in lung donations.  
38 It should be noted that lung as well as heart donations have been very low in number in all  
39 regions across all the years compared to other organs and this may reflect the fact that heart  
40 beating donors, on which heart and most lung transplants depend, have been decreasing for  
41 around a decade across the UK.[7]  
42  
43  
44  
45  
46  
47  
48  
49  
50  
51  
52  
53  
54  
55

56 Kidney and corneal donations showed significant regional differences but these were not  
57 consistent across the time period investigated, as indicated by the need to add an interaction  
58 term to the models. No discernable pattern emerges from the kidney donation data although it  
59  
60



1 is perhaps worth noting that for most of the first decade examined, England was the lowest  
2 contributor; in the second decade, with the exception of one year (2008-09), the lowest  
3 contributions came from Scotland.  
4  
5  
6  
7  
8  
9

10  
11 The pattern for corneal donations shows a greater consistency for most regions except Wales,  
12 which contributed significantly more corneal tissue than the other regions between 1995 and  
13 2005 but subsequently decreased to levels comparable to pre-1995 and to those of England.  
14  
15  
16  
17  
18  
19  
20  
21  
22  
23  
24  
25  
26  
27  
28  
29  
30  
31  
32  
33  
34  
35  
36  
37  
38  
39  
40  
41  
42  
43  
44  
45  
46  
47  
48  
49  
50  
51  
52  
53  
54  
55  
56  
57  
58  
59  
60  
There is no obvious reason for this trend. Perhaps the most striking picture to emerge from the  
data shown in Table 1 is the low rate of corneal donations in Northern Ireland, particularly  
when compared with those of England and Wales. Scotland and Northern Ireland were very  
similar in corneal donations in the early part of the first decade examined but subsequently the  
gap increased.

The patterns seen with corneal donations may reflect attitudes based on culture and tradition  
as well as on lack of awareness of what eye donation involves. In Northern Ireland, and to a  
lesser extent in Scotland, the tradition of wakes and burial remains strong. Disfiguring the  
face of a deceased loved one before burial by removing the eyeballs, is unlikely to be  
accepted.[8] There is no eye bank or retrieval centre in Northern Ireland; if such a centre is  
ever established the effect of collecting eye tissue on facial appearance will require  
comprehensive explanation as studies show that procuring corneal tissue is erroneously  
considered to be a procedure that leads to disfigurement.[8-10] In Wales and England, where  
over 70% of deaths result in cremations (compared to around 60% of deaths in Scotland and  
15% in Northern Ireland) [11], the issue of the facial appearance of the deceased may be of  
less importance. The presence of an eye bank would make it possible to procure corneal  
tissue locally, however, it has been found that appropriately trained and dedicated staff are

1 the most likely means of increasing corneal donations.[12-13] Co-ordinated organisation and  
2 appropriate policies and staff training would also improve consent to donation of other  
3 organs.[14-15]  
4  
5  
6

7  
8 It should be noted that in addition to differences in rates of donation of different organs, there  
9 are variations in their health status and in time limitations permitted for maintaining a status  
10 that is suitable for transplantation. For example, in the years 2009 to 2010, an average of 11%  
11 of all organs retrieved were not subsequently transplanted.[7] This applied particularly to the  
12 retrieval of lungs and liver. Although approximately 33% of all corneas recovered during the  
13 same period were deemed unsuitable for transplantation,[7] the cornea is more viable than the  
14 heart and lungs due to its ability to survive for an extended period of time in appropriate  
15 medium before transplantation. A confidential audit of deaths in England and Wales showed  
16 that approximately 92% of donors had a suitable cornea for donation, while 65% had a  
17 suitable heart for donation and only 31 per cent had suitable lungs for donation.[16]  
18  
19  
20  
21  
22  
23  
24  
25  
26  
27  
28  
29  
30  
31  
32  
33  
34  
35

36 *Can parallels be drawn from the EU?*  
37

38  
39 It has been suggested that at least 20-30 deceased donors per million population would be  
40 necessary to meet the UK's increasing demands.[17] The British Medical Association called  
41 for changes in legislation, suggesting a system of presumed consent that allows for objections  
42 of relatives.[18] The Organ Donation Taskforce was commissioned in 2008 to consider the  
43 potential effects of such legislation and concluded that a change to presumed consent at this  
44 time was unlikely to increase organ donation rates, may incur prohibitive costs and could  
45 result in a backlash; other factors needed to be considered before introducing legislative  
46 change.[19]  
47  
48  
49  
50  
51  
52  
53  
54  
55  
56  
57  
58  
59  
60

1  
2  
3  
4  
5  
6  
7  
8  
9  
10  
11  
12  
13  
14  
15  
16  
17  
18  
19  
20  
21  
22  
23  
24  
25  
26  
27  
28  
29  
30  
31  
32  
33  
34  
35  
36  
37  
38  
39  
40  
41  
42  
43  
44  
45  
46  
47  
48  
49  
50  
51  
52  
53  
54  
55  
56  
57  
58  
59  
60

Bird and Harris modelled situations with varying relative refusal rates and drew on comparisons with EU countries that already adopted presumed consent systems.[20] However, presumed consent for organ donation has been implemented with varying effect in the EU. Adoption and successful implementation of laws in one country should not be taken as a guarantee of similar success in another. Hence, though Sweden applies presumed consent, its donation rate in 2009, at 13.8 deceased donors per million population,[6] was comparable to that of Germany (14.5 deceased donors per million population) and Denmark (14.0 deceased donors per million population);[5] both of which require informed consent (Figure 2). The figures available for Ireland, where informed consent is needed, were 21.2 deceased donors per million population in 2009.[4] The nation with the highest donor rate (34.4 deceased donors per million population in 2009) [21], and one often cited as evidence of successful implementation of presumed consent legislation [22], is Spain which operates a “soft” form of presumed consent where next of kin can object to organ donation.[21-22] Yet, the impact of the legislation has been questioned and the high rate of donor activity attributed to the “Spanish Model”[21-22] that demands an integrated approach with dedicated transplant co-ordinators, mainly intensive care physicians, involved in procurement.[22] This highly coordinated network and the respect for autonomy given to the individual and their relatives, is credited with improving donation rates of 14.3 deceased donors per million population in 1989 to rates of 33-35 deceased donors per million population in recent years.[21-22] The majority of donations in Spain are from heart-beating donors in intensive care; live organ donation and that from non-heart beating donors is relatively low.[22] The converse is true in the UK and estimates suggest that even if a theoretical upper limit were reached, with present facilities and practices, heart beating donor numbers in the UK would only reach half of those in Spain.[22] Given that Spain introduced presumed consent in 1979[3], it is clear that a legislative change alone was not sufficient to improve donation rates. It is notable that Spain achieves a significantly higher rate of donation than does

1 Austria [5] which relies upon a “hard” approach in which views of relatives are not routinely  
2 sought.  
3  
4  
5  
6

7 Comparisons across the EU further indicate that whilst a country may have relatively low  
8 overall donation rates, for certain organs the trend may be reversed. Sweden lags behind  
9 countries like Austria, Belgium, Germany and the Netherlands with regard to overall  
10 deceased donations but has had the highest kidney donation rate for the majority of the past  
11  
12  
13  
14  
15  
16  
17 13 years.[5-6]

## 22 **Conclusions**

23  
24  
25 Data from the four UK regions show that organ donation rates vary over the last two decades  
26 and that for two of the organs, kidney and cornea, the significance of regional variations is  
27 moderated by variations in time. The cornea, in particular, shows shortfalls in donation rates  
28 from Northern Ireland. Further exploration of underlying regional differences and temporal  
29 variations in organ donation as well as organisational issues, practices and attitudes that may  
30 affect organ donation, needs to be undertaken before considering legislation to admit  
31 presumed consent. Comparison of EU nations, and particularly Spain, indicates that  
32 improvement of organ donation rates is unlikely to be achieved by introducing new  
33 legislation alone.  
34  
35  
36  
37  
38  
39  
40  
41  
42  
43  
44  
45  
46  
47  
48

49 **Provenance/Contributorship:** Barbara Pierscionek is a Professor of Vision Science at the  
50 School of Biomedical Science, University of Ulster and is qualified in science and law.  
51  
52 Gordon Rae is a Professor of Psychology at the School of Psychology, University of Ulster,  
53 and is trained in mathematics and statistics as well as psychology. Carol McClenahan is a  
54 lecturer in Psychology at the School of Psychology, University of Ulster and her expertise is  
55 in attitude and behavioural change in relation to health. Donal McGlade is currently  
56  
57  
58  
59  
60

1  
2  
3  
4  
5  
6  
7  
8  
9  
10  
11  
12  
13  
14  
15  
16  
17  
18  
19  
20  
21  
22  
23  
24  
25  
26  
27  
28  
29  
30  
31  
32  
33  
34  
35  
36  
37  
38  
39  
40  
41  
42  
43  
44  
45  
46  
47  
48  
49  
50  
51  
52  
53  
54  
55  
56  
57  
58  
59  
60

undertaking a PhD on attitudes that determine behaviour with respect to organ donation. All authors were involved in preparation of the manuscript. Barbara Pierscionek is the guarantor.

“All authors have completed the Unified Competing Interest form at [www.icmje.org/coi\\_disclosure.pdf](http://www.icmje.org/coi_disclosure.pdf) (available on request from the corresponding author) (URL) and declare that all authors had: (1) No financial support for the submitted work from anyone other than their employer; (2) No financial relationships with commercial entities that might have an interest in the submitted work; (3) No spouses, partners, or children with relationships with commercial entities that might have an interest in the submitted work; (4) No Non-financial interests that may be relevant to the submitted work.”

“This research received no specific grant from any funding agency in the public, commercial or not-for-profit sectors.”

“The Corresponding Author has the right to grant on behalf of all authors and does grant on behalf of all authors, an exclusive licence (or non-exclusive for government employees) on a worldwide basis to the BMJ Group and co-owners or contracting owning societies (where published by the BMJ Group on their behalf), and its Licensees to permit this article (if accepted) to be published in BMJ Open and any other BMJ Group products and to exploit all subsidiary rights, as set out in our licence.”

**Acknowledgements:** The authors would like to acknowledge the valuable comments of reviewers Professors Collett and Atkinson which have served to improve the statistical analysis of the paper.

## References

1. Smith M, Murphy P. A historic opportunity to improve organ donation rates in the UK. *Br J Anaesth* 2008;100:735-737.
2. NHSBT [Internet]. 2011 [updated 2011 June 20; cited 2011 July 18]. Available from: [http://www.uktransplant.org.uk/ukt/newsroom/news\\_releases/article.jsp?releaseId=271](http://www.uktransplant.org.uk/ukt/newsroom/news_releases/article.jsp?releaseId=271)
3. Gäbel H. Organ donor registers. *Curr Opin Organ Transplant* 2006;11:187-193.
4. Organ Procurement Service. Annual Report 2008-2009. Dublin:Organ Procurement Service; 2008-2009.
5. Cohen B, Persijn G. Annual Report 1997-2009. Leiden:Eurotransplant International Foundation; 1997-2009.
6. Scandiatransplant. Personal communication with assistant to the medical director at Scandiatransplant, 27th January 2011.
7. NHS Blood & Transplant. Transplant activity in the UK: Activity report 2009/10. Bristol: NHS Blood & Transplant; 2010.
8. Kent B, Owens RG. Conflicting attitudes to corneal and organ donation: a study of nurses' attitudes to organ donation. *Int J Nurs Stud* 1995;32:484-492.
9. Hayward C, Madill A. The meanings of organ donation: Muslims of Pakistani origin and white English nationals living in North England. *Soc Sci Med* 2003;57:389-401.
10. Lawlor M, Kerridge I, Ankeny R, et al. Specific unwillingness to donate eyes: the impact of disfigurement, knowledge and procurement on corneal donation. *Am J Transplant* 2010; 10:657-663.
11. The Cremation Society of Great Britain. Table of cremations carried out in the United Kingdom [Internet]. 2008 [updated 2010 Oct 27; cited 2010 Oct 27]. Available from: <http://www.srgw.demon.co.uk/cremsoc/>

- 1  
2  
3  
4  
5  
6  
7  
8  
9  
10  
11  
12  
13  
14  
15  
16  
17  
18  
19  
20  
21  
22  
23  
24  
25  
26  
27  
28  
29  
30  
31  
32  
33  
34  
35  
36  
37  
38  
39  
40  
41  
42  
43  
44  
45  
46  
47  
48  
49  
50  
51  
52  
53  
54  
55  
56  
57  
58  
59  
60
12. Delbosc, B. Difficult cornea procurement: causes and consequences of the exceptional situation in France. *J Fr Ophtalmol* 2000;23:196-199.
13. Mack RJ, Mason P, Mathers WD. Obstacles to donor eye procurement and solutions at the University of Iowa. *Cornea* 1995;14:249-252.
14. Rodrigue JR, Cornell DL, Howard RJ. Organ donation decision: comparison of donor and nondonor families. *Am J Transplant* 2006; 6:190-198.
15. Salim A, Brown C, Inaba K, et al. Improving consent rates for organ donation: the effect of an inhouse coordinator program. *J Trauma* 2007;62:1411-1415.
16. Gore SM, Cable DJ, Holland AJ. Organ donation from intensive care units in England and Wales: two year confidential audit of deaths in intensive care. *BMJ* 1992;304:349-355.
17. Cameron S, Forsythe J. How can we improve organ donation rates? Research into the identification of factors which may influence the variation. *Nefrologia* 2001;21:68-77.
18. British Medical Association Medical Ethics Committee. Organ donation in the 21<sup>st</sup> century: Time for a consolidated approach. London:British Medical Association; 2000.
19. Organ Donation Taskforce. The potential impact of an opt out system for organ donation in the UK: an independent report from the Organ Donation Taskforce. London:UK Department of Health; 2008.
20. Bird SM, Harris J. Time to move to presumed consent for organ donation. *BMJ* 2010;340:c2188.
21. Matesanz R, Marazuela R, Domínguez-Gil B, et al. The 40 donors per million population plan: an action plan for improvement of organ donation and transplantation in Spain. *Transplant Proc* 2009;41:3453-3456.
22. Fabre J, Murphy P, Matesanz R. Presumed consent: a distraction in the quest for increasing rates of organ donation. *BMJ* 2010;341:c4973

**Figure captions**

Figure 1: a) Organ donor registration rates in England, Wales, Scotland and Northern Ireland 1994-2009. b) Organ donation rates in England, Wales, Scotland and Northern Ireland 1990-2009.

Figure 2: Organ donor rates in selected EU countries 1997-2009.[5-6]

For peer review only

1  
2  
3  
4  
5  
6  
7  
8  
9  
10  
11  
12  
13  
14  
15  
16  
17  
18  
19  
20  
21  
22  
23  
24  
25  
26  
27  
28  
29  
30  
31  
32  
33  
34  
35  
36  
37  
38  
39  
40  
41  
42  
43  
44  
45  
46  
47  
48  
49  
50  
51  
52  
53  
54  
55  
56  
57  
58  
59  
60



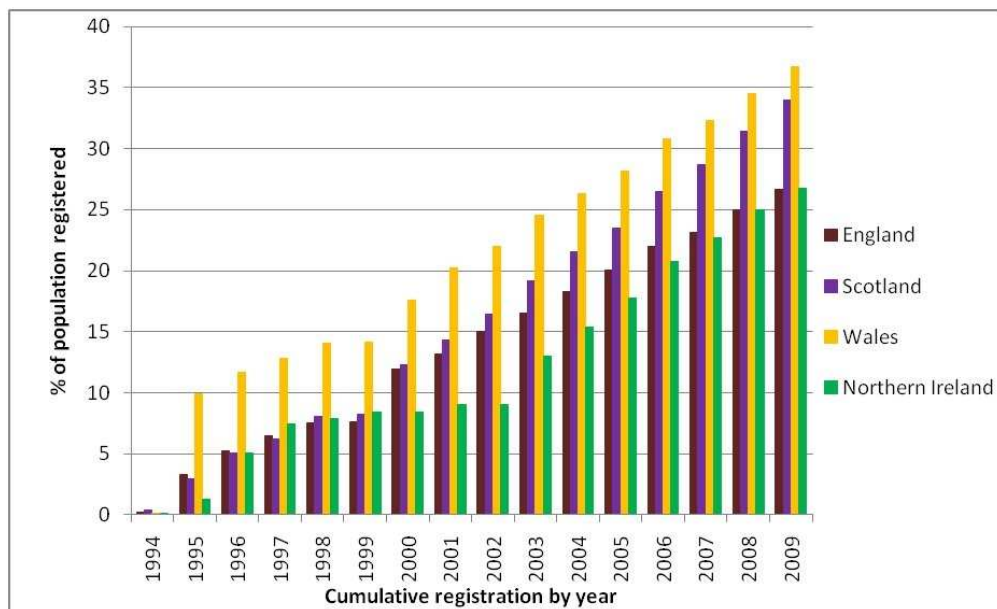

39x23mm (600 x 600 DPI)

Review only

1  
2  
3  
4  
5  
6  
7  
8  
9  
10  
11  
12  
13  
14  
15  
16  
17  
18  
19  
20  
21  
22  
23  
24  
25  
26  
27  
28  
29  
30  
31  
32  
33  
34  
35  
36  
37  
38  
39  
40  
41  
42  
43  
44  
45  
46  
47  
48  
49  
50  
51  
52  
53  
54  
55  
56  
57  
58  
59  
60

1  
2  
3  
4  
5  
6  
7  
8  
9  
10  
11  
12  
13  
14  
15  
16  
17  
18  
19  
20  
21  
22  
23  
24  
25  
26  
27  
28  
29  
30  
31  
32  
33  
34  
35  
36  
37  
38  
39  
40  
41  
42  
43  
44  
45  
46  
47  
48  
49  
50  
51  
52  
53  
54  
55  
56  
57  
58  
59  
60

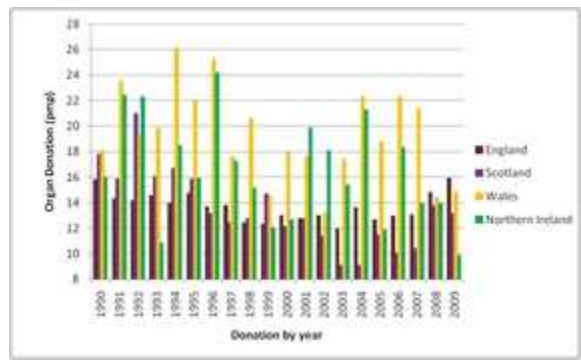

24x14mm (300 x 300 DPI)

peer review only

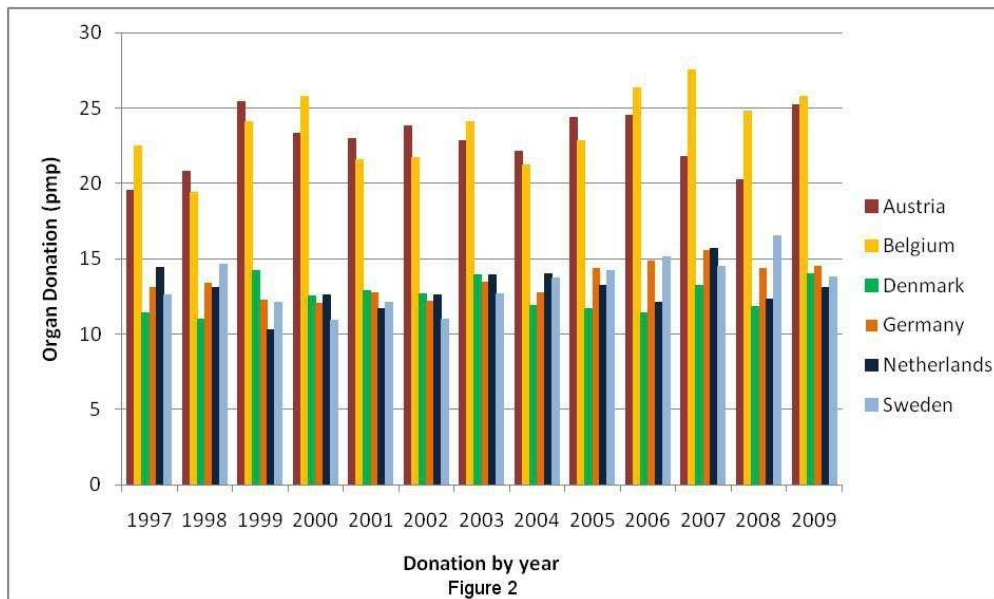

80x48mm (300 x 300 DPI)

review only

## ■ Research review guidelines : modified from RATS guidelines

| ASK THIS OF THE MANUSCRIPT                                                                                                                                                                                                      | THIS SHOULD BE INCLUDED IN THE MANUSCRIPT                                                                                                                                                  | ✓<br><>    |
|---------------------------------------------------------------------------------------------------------------------------------------------------------------------------------------------------------------------------------|--------------------------------------------------------------------------------------------------------------------------------------------------------------------------------------------|------------|
| <b>R Relevance of study question</b><br><br>Is the research question interesting?<br><br>Is the research question relevant to clinical practice, public health, or policy? <i>It is relevant to policy</i>                      | Research question explicitly stated<br><br>Research question justified and linked to the existing knowledge base (empirical research, theory, policy)                                      | ✓<br><br>✓ |
| <b>A Appropriateness of the method</b><br><br>Is the methodology used the best approach for the study aims?                                                                                                                     | Study design described and justified : <i>data for all organ donations and registrations was required in order to compare trends across the four UK regions.</i>                           | ✓          |
| <b>T Transparency of procedures</b>                                                                                                                                                                                             |                                                                                                                                                                                            |            |
| <i>Data collection</i><br><br>Was collection of data systematic and comprehensive?<br><br>Why and when was data collection stopped, and is this reasonable?                                                                     | Method (s) outlined : <i>all available data from centralized sources collected</i><br><br>End of data collection justified and described: <i>all available complete data was collected</i> | ✓<br><br>✓ |
| <b>S Soundness of interpretive approach</b><br><br><i>Analysis</i><br><br>Is the type of analysis appropriate for the type of study?<br><br>Are the interpretations clearly presented and adequately supported by the evidence? | Analytic approach described in depth and justified<br><br>Statistical analysis conducted using appropriate test<br><br>Analysis, presentation and interpretation provided                  | ✓<br><br>✓ |
| <i>Discussion and presentation</i>                                                                                                                                                                                              |                                                                                                                                                                                            |            |

1  
2  
3  
4 Is adequate account taken of previous  
5 knowledge and how the findings add?  
6

Findings presented with reference to existing literature, and  
how they contribute



7 Is the manuscript well written and accessible?  
8  
9

Evidence of following guidelines (format, word count)  
Written for a health sciences audience



10  
11  
12  
13  
14  
15  
16  
17  
18  
19  
20  
21  
22  
23  
24  
25  
26  
27  
28  
29  
30  
31  
32  
33  
34  
35  
36  
37  
38  
39  
40  
41  
42  
43  
44  
45  
46  
47  
48  
49  
50  
51  
52  
53  
54  
55  
56  
57  
58  
59  
60

For peer review only
